1 **Architecture of TAF11/TAF13/TBP complex suggests novel**  
2 **regulatory state in General Transcription Factor TFIID function**

3

4 Kapil Gupta<sup>1,2</sup>, Aleksandra A. Watson<sup>3</sup>, Tiago Baptista<sup>4,7</sup>, Elisabeth Scheer<sup>4,7</sup>, Anna L.  
5 Chambers<sup>1</sup>, Christine Koehler<sup>8</sup>, Juan Zou<sup>9</sup>, Ima Obong-Ebong<sup>10</sup>, Eaazhisai Kandiah<sup>2,11</sup>, Arturo  
6 Temblador<sup>2</sup>, Adam Round<sup>2</sup>, Eric Forest<sup>11</sup>, Petr Man<sup>12</sup>, Christoph Bieniossek<sup>2</sup>, Ernest D. Laue<sup>3</sup>,  
7 Edward A. Lemke<sup>8</sup>, Juri Rappsilber<sup>9</sup>, Carol V. Robinson<sup>10</sup>, Didier Devys<sup>4,7</sup>, Laszlo Tora<sup>4-7\*</sup> and  
8 Imre Berger<sup>1\*</sup>

9 <sup>1</sup> The School of Biochemistry, Biomedical Sciences and BrisSynBio Centre, University of  
10 Bristol, Tankard's Close, Bristol BS8 1TD, United Kingdom

11 <sup>2</sup> European Molecular Biology Laboratory, 71 Avenue des Martyrs, 38000 Grenoble, France

12 <sup>3</sup> Department of Biochemistry, University of Cambridge, 80 Tennis Court Road, Cambridge  
13 CB2 1GA, United Kingdom

14 <sup>4</sup> Institut de Génétique et de Biologie Moléculaire et Cellulaire IGBMC, Illkirch, France

15 <sup>5</sup> Centre National de la Recherche Scientifique, UMR7104, Illkirch, France

16 <sup>6</sup> Institut National de la Santé et de la Recherche Médicale, U964, Illkirch, France

17 <sup>7</sup> Université de Strasbourg, Illkirch, France

18 <sup>8</sup> European Molecular Biology Laboratory, Meyerhofstrasse 1, 69117 Heidelberg, Germany

19 <sup>9</sup> Wellcome Trust Centre for Cell Biology, University of Edinburgh, Max Born Crescent,  
20 Edinburgh, EH9 3BF, United Kingdom and Chair of Bioanalytics, Institute of  
21 Biotechnology, Technische Universität Berlin, 13355 Berlin, Germany

22 <sup>10</sup> Physical and Theoretical Chemistry Laboratory, South Parks Road, Oxford OX1 3QZ,  
23 United Kingdom

24 <sup>11</sup> Institut de Biologie Structurale IBS, 71 Avenue des Martyrs, 38042 Grenoble, France

25 <sup>12</sup> BioCeV - Institute of Microbiology, The Czech Academy of Sciences, Prumyslova 595,  
26 252 50 Vestec and Faculty of Science, Charles University, Hlavova 8, 128 43 Prague,  
27 Czech Republic

28

29 # Corresponding authors: Laszlo Tora ([laszlo.tora@igbmc.fr](mailto:laszlo.tora@igbmc.fr)) & Imre Berger  
30 ([imre.berger@bristol.ac.uk](mailto:imre.berger@bristol.ac.uk))

31 **ABSTRACT**

32 General transcription factor TFIID is a key component of RNA polymerase II transcription  
33 initiation. Human TFIID is a megadalton-sized complex comprising TATA-binding protein  
34 (TBP) and 13 TBP-associated factors (TAFs). TBP binds to core promoter DNA, recognizing  
35 the TATA-box. We identified a ternary complex formed by TBP and the histone fold (HF)  
36 domain-containing TFIID subunits TAF11 and TAF13. We demonstrate that TAF11/TAF13  
37 competes for TBP binding with TATA-box DNA, and also with the N-terminal domain of  
38 TAF1 previously implicated in TATA-box mimicry. In an integrative approach combining  
39 crystal coordinates, biochemical analyses and data from cross-linking mass-spectrometry  
40 (CLMS), we determine the architecture of the TAF11/TAF13/TBP complex, revealing  
41 TAF11/TAF13 interaction with the DNA binding surface of TBP. We identify a highly  
42 conserved C-terminal TBP-binding domain (CTID) in TAF13 which is essential for  
43 supporting cell growth. Our results thus have implications for cellular TFIID assembly and  
44 suggest a novel regulatory state for TFIID function.

45

## 46 INTRODUCTION

47 Eukaryotic gene expression is a highly regulated process which is controlled by a plethora of  
48 proteins, arranged in multiprotein complexes including the general transcription factors  
49 (GTFs), Mediator and RNA polymerase II (Pol II) (Gupta et al. 2016; Thomas and Chiang  
50 2006). Regulated class II gene transcription is initiated by sequential nucleation of GTFs and  
51 Mediator on core promoter DNA (Rhee and Pugh 2012). The GTF TFIID is a cornerstone in  
52 this process and links cellular signaling events with regulatory DNA elements and the  
53 components of the transcription machinery (Albright and Tjian 2000). A basal transcription  
54 system which supports initiation can be reconstituted with TBP and the GTFs TFIIA, TFIIB,  
55 TFIIE, TFIIF and TFIIH *in vitro*, however, TFIID is required to respond to activators  
56 (Hampsey and Reinberg 1999). In mammalian cells, the promoters of virtually all protein-  
57 encoding genes are occupied by TFIID, and loss of TFIID components causes embryonic  
58 lethality (Gegonne et al. 2012; Kim et al. 2005; Mohan et al. 2003). TFIID subunits are  
59 thought to mediate cross-talk with epigenetic modifications on nucleosomes and regulatory  
60 DNA elements in promoter regions (Vermeulen et al. 2007; Verrijzer et al. 1995). X-ray  
61 crystallography revealed many details of TFIID components at near atomic resolution (Gupta  
62 et al. 2016). Cryo-electron microscopy (cryo-EM) provided essential insight into TFIID  
63 architecture and promoter DNA interaction (Bieniossek et al. 2013; Cianfrocco et al. 2013;  
64 Louder et al. 2016). The recent identification of a discrete TAF-containing complex in the  
65 cytoplasm of cells provided first insight into holo-TFIID assembly from preformed sub-  
66 modules, regulated by nuclear import mechanisms (Trowitzsch et al. 2015).

67 Canonical human TFIID comprises TATA-binding protein (TBP) and 13 TBP-  
68 associated factors (TAFs) (Matangkasombut et al. 2004, Muller and Tora 2014).  
69 Furthermore, non-canonical TFIID and TAF-containing complexes have been identified  
70 regulating spermatogenesis and stem cell development (Goodrich and Tjian 2010; Maston et

71 al. 2012; Muller et al. 2010). A nuclear core-TFIID complex was identified made up of two  
72 copies each of TAF4, 5, 6, 9 and 12 (Bieniossek et al. 2013; Wright et al. 2006). Biochemical  
73 and structural studies established the histone-fold domain (HFD) as a key TAF-TAF  
74 interaction motif within TFIID (Gangloff et al. 2001a). TAF3, 4, 6, 8, 9, 10, 11, 12 and 13  
75 contain HFDs and assemble specifically into heterodimers (TAF3-10, TAF4-12, TAF6-9,  
76 TAF8-10 and TAF11-13) (Birck et al. 1998; Gangloff et al. 2001b; Werten et al. 2002; Xie et  
77 al. 1996).

78 TFIID recognizes core promoter DNA via its TATA-box binding protein subunit,  
79 TBP. TBP is central to transcription regulation in eukaryotes and is the only subunit present  
80 in the transcription initiation complexes of each of the three RNA polymerases (Koster et al.  
81 2015; Thomas and Chiang 2006; Tora and Timmers 2010). TBP consists of a highly variable  
82 N-terminal domain with less well understood function and a conserved DNA-binding C-  
83 terminal core domain comprising two symmetrical pseudo-repeats (Thomas and Chiang  
84 2006; Tora and Timmers 2010). Crystal structures of the conserved TBP core revealed a  
85 saddle-like shape with a concave DNA binding surface recognizing the minor groove of  
86 TATA-box containing DNA (Kim et al. 1993; Nikolov et al. 1996; Nikolov et al. 1992).

87 The DNA-binding activity of TBP/TFIID is tightly regulated by gene-specific co-  
88 factors that can activate or inhibit transcription (Koster et al. 2015; Tora and Timmers 2010).  
89 The mechanism of a number of these regulatory factors has been described in molecular  
90 detail. The TFIID component TAF1 was found to associate with the concave DNA-binding  
91 surface of TBP via its N-terminal domain (TAF1-TAND), exhibiting TATA-box mimicry  
92 (Anandapadamanaban et al. 2013). TAF1-TAND, unstructured in isolation, was found to  
93 adopt a three-dimensional structure closely resembling the TATA-element is shape and  
94 charge distribution when bound to TBP (Burley and Roeder 1998; Liu et al. 1998). This  
95 interaction is conserved in yeast, *Drosophila* and human (Anandapadamanaban et al. 2013;

96 Burley and Roeder 1998; Liu et al. 1998; Mal et al. 2004). The recent high-resolution  
97 structure of TBP bound to yeast TAF1-TAND revealed anchoring patterns in transcriptional  
98 regulation shared by TBP interactors, providing insight into the competitive  
99 multiprotein TBP interplay critical to transcriptional regulation (Anandapadamanaban et al.  
100 2013). Mot1 is an ATP dependent inhibitor of TBP/TATA-DNA complex formation (Auble  
101 and Hahn 1993). Mot1 regulates the genomic distribution of TBP and was shown to influence  
102 transcription levels both positively and negatively (Pereira et al. 2003). Recent structural  
103 analysis revealed the molecular mechanism of Mot1 wrapping around TBP resembling a  
104 bottle opener, with a ‘latch helix’ blocking the concave DNA-binding surface of TBP and  
105 acting as a chaperone to prevent DNA re-binding to ensure promoter clearance (Wollmann et  
106 al. 2011). Mot1 and negative co-factor 2 (NC2) are thought to cooperate in gene-specific  
107 repression of TBP activity (Hsu et al. 2008). The GTF TFIIA, on the other hand, competes  
108 with NC2 for TBP (Kamada et al. 2001; Xie et al. 2000) and promotes TBP/DNA interactions  
109 in a ternary TFIIA/TBP/DNA complex, facilitating formation of and stabilizing the  
110 preinitiation complex (PIC). Interaction of TFIIA with TBP results in the exclusion of  
111 negative factors that would interfere with PIC formation, and TFIIA acts as a coactivator  
112 assisting transcriptional activators in increasing transcription levels (Bleichenbacher et al.  
113 2003).

114 Genetic and biochemical experiments suggested that the TFIIA/TBP/DNA complex is  
115 further stabilized by the histone-fold containing TFIID subunits TAF11 and TAF13  
116 conveying the formation of a TAF11/TAF13/TFIIA/TBP/DNA assembly (Kraemer et al.  
117 2001; Lavigne et al. 1999; Robinson et al. 2005). We therefore set out to investigate this  
118 putative pentameric complex in detail. Unexpectedly, we did not observe a stabilization of  
119 TFIIA/TBP/DNA complex by TAF11/TAF13 but found a marked destabilization of the  
120 TFIIA/TBP/DNA complex by TAF11/TAF13, resulting in the release of free DNA and the

121 formation of a stable ternary complex formed by TAF11/TAF13 and TBP. We analysed the  
122 TAF11/TAF13/TBP complex biochemically and structurally utilizing a comprehensive,  
123 integrative approach. We report a novel interaction of the TAF11/TAF13 dimer binding to  
124 the concave DNA-binding groove of TBP, thus excluding TATA-box containing DNA.  
125 Using pull-down experiments with immobilized TAF1-TAND, we demonstrate competition  
126 between TAF11/TAF13 and TAF1-TAND for TBP binding. We identify a novel C-terminal  
127 TBP-binding domain (CTID) within TAF13 which is highly conserved from yeast to man.  
128 We probe key residues within this TAF13 CTID by mutagenesis *in vitro* and *in vivo* in cell  
129 growth experiments, revealing a key role of this domain for viability. We contrast the  
130 TAF11/TAF13 interaction with other TBP DNA-binding groove interactors including Mot1  
131 and discuss the implications of our findings in the context of TFIID assembly. Based on our  
132 results, we propose a novel, functional state of TFIID in transcription regulation.  
133

## 134 **RESULTS**

### 135 **Identification of a novel TAF11/TAF13/TBP ternary complex**

136 We set out to analyze the structure of a putative pentameric TAF11/TAF13/TFIIA/TBP/DNA  
137 complex (Kraemer et al. 2001; Lavigne et al. 1999; Robinson et al. 2005), with the objective  
138 to better understand the possible roles of TAF11/TAF13 in TFIID function. First we purified  
139 human TAF11/TAF13 complex and TBP to homogeneity (Figure 1A). TFIIA in human cells  
140 is made from two precursor polypeptides, TFIIA $\alpha\beta$  and TFIIA $\gamma$ , with TFIIA $\alpha\beta$  processed *in*  
141 *vivo* into two separate polypeptides,  $\alpha$  and  $\beta$ , by proteolytic cleavage mediated by the  
142 protease Taspase1 (Hoiby et al. 2007). Recombinant human TFIIA is typically produced in *E.*  
143 *coli* by refolding from three separate polypeptides expressed in inclusion bodies, which  
144 correspond to the native  $\alpha$ ,  $\beta$  and  $\gamma$  chains (Bleichenbacher et al. 2003). To facilitate  
145 recombinant human TFIIA production, we designed a single-chain construct (TFIIA<sup>s-c</sup>) by  
146 connecting  $\alpha$ ,  $\beta$  and  $\gamma$  by flexible linkers, based on atomic coordinates taken from the crystal  
147 structure of human TFIIA/TBP/DNA complex (Bleichenbacher et al. 2003). TFIIA<sup>s-c</sup> could  
148 be produced in high amounts in soluble form in *E. coli* and purified to homogeneity without  
149 any need for refolding steps (see Methods section). We stored highly purified TFIIA<sup>s-c</sup> at 4°C,  
150 and observed the formation of needle-shaped crystals in the storage buffer after several  
151 weeks. We improved the crystals manually and determined the 2.4Å crystal structure of  
152 TFIIA<sup>s-c</sup> (Figure 1A, Figure 1–Figure Supplement 1, Table 1). The crystal structure revealed a  
153 virtually identical conformation of unliganded TFIIA<sup>s-c</sup> as compared to TFIIA in the  
154 TFIIA/TBP/DNA complex. Moreover, the crystal structure highlighted the importance of the  
155 connecting loops we had introduced in stabilizing the three-dimensional crystal lattice  
156 (Figure 1–Figure Supplement 1). TFIIA<sup>s-c</sup> was active in a band-shift assay with TBP and  
157 adenovirus major late promoter (AdMLP) TATA-DNA (Figure 1A), similar to purified  
158 TFIIA using the classical refolding protocol (Bleichenbacher et al. 2003).

159           Next, we attempted to reconstitute the TAF11/TAF13/TFIIA/TBP/DNA complex  
160 following published procedures (Kraemer et al. 2001; Robinson et al. 2005). Titrating  
161 TAF11/TAF13 dimer to a preformed TFIIA/TBP/DNA complex had been reported to  
162 stabilize TFIIA/TBP/DNA in band-shift assays using AdMLP TATA-DNA (Robinson et al.  
163 2005). Surprisingly, in our titration experiments, TAF11/TAF13 did not stabilize the  
164 preformed TFIIA/TBP/DNA complex but, in marked contrast, resulted in TAF11/TAF13-  
165 dependent release of free promoter-containing DNA in band-shift assays (Figure 1B). We  
166 analysed the possible underlying intermolecular interactions that may be formed between the  
167 individual components TAF11/TAF13, TFIIA<sup>s-c</sup>, TBP and AdMLP TATA-DNA. We  
168 observed that TFIIA<sup>s-c</sup> and TAF11/TAF13 did not interact in our experiments (Figure 1–  
169 Figure Supplement 2). Combining the TAF11/TAF13 dimer with TBP, in contrast, revealed a  
170 novel TAF11/TAF13/TBP complex that was stable in size exclusion experiments (Figure  
171 1C). We concluded that human TAF11/TAF13 did not further stabilize the preformed  
172 TFIIA/TBP/DNA complex, but rather sequestered TBP from this complex giving rise to a  
173 novel assembly comprising TAF11, TAF13 and TBP.

#### 174 **TATA-DNA and TAF1-TAND compete with TAF11/TAF13 for TBP binding**

175 We tested competition between TAF11/TAF13/TBP formation and TBP binding to AdMLP  
176 DNA and showed that the ternary TAF11/TAF13/TBP complex remained stable in the  
177 presence of excess AdMLP DNA (Figure 1D). Thus, our results indicate that TAF11/TAF13  
178 and TATA-DNA compete for at least parts of the same binding interface within TBP, and  
179 that once TAF11/TAF13 is bound to TBP, TATA-DNA binding is precluded.

180           TAF1 had been shown previously to bind to the DNA-binding surface of TBP via its  
181 TAND domain (Anandapadamanaban et al. 2013; Burley and Roeder 1998; Liu et al. 1998).  
182 We produced human TAF1-TAND fused to maltose-binding protein (MBP) and immobilized  
183 highly purified fusion protein to an amylose column (Methods). We added preformed,



184 purified TAF11/TAF13/TBP complex in a pull-down assay using immobilized TAF1-TAND.  
185 We found that TAF1-TAND effectively sequestered TBP from the TAF11/TAF13/TBP  
186 complex, evidenced by TAF11/TAF13 eluting in the flow-through fraction. Elution by  
187 maltose, in contrast, revealed a TAF1-TAND/TBP complex (Figure 1E). Together, these  
188 findings substantiate our view that TAF11/TAF13, TAF1-TAND and AdMLP TATA-DNA  
189 all interact with the concave DNA-binding surface of TBP, and that the interactions are  
190 mutually exclusive.

### 191 **TAF11, TAF13, TBP form a 1:1:1 complex**

192 Next we set out to determine the subunit stoichiometry within the TAF11/TAF13/TBP  
193 complex, by using two complementary methods, analytical ultra-centrifugation (AUC) and  
194 native mass-spectrometry (native MS). Both methods were consistent in revealing a 1:1:1  
195 complex (Figure 2A, B; Figure 2–Figure Supplement 1). Collision-induced dissociation  
196 (CID) in native MS, evidenced a TBP monomer and a TAF11/TAF13 dimer (Figure 2B). Of  
197 note, our control experiment using highly purified TBP evidenced a dimer in the native MS  
198 (Figure 2–Figure Supplement 1). To obtain first three-dimensional information of the  
199 TAF11/TAF13/TBP complex, we performed small-angle X-ray scattering (SAXS)  
200 experiments (Figure 2C, Figure 2–Figure Supplement 2, Table 2). Superimposition of the  
201 SAXS envelopes of the dimeric TAF11/TAF13 complex on one hand, and the ternary  
202 TAF11/TAF13/TBP complex on the other, provided further evidence that TAF11/TAF13  
203 binds to the concave surface of TBP and underscored the presence of one copy each of the  
204 constituent proteins in the based on steric considerations. TAF11 and TAF13 contain  
205 unstructured regions, notably in the N-terminal part of TAF11, giving rise to a pan-handle  
206 shaped extension in the TAF11/TAF13 SAXS envelope, which is not present in SAXS  
207 envelopes of a truncated TAF11/TAF13 dimer comprising the more globular histone fold  
208 domains only (data not shown). This extension, which was likewise observed in the

209 TAF11/TAF13/TBP SAXS data, facilitated superimposition of the respective envelopes  
210 considerably. In aggregate, our results are consistent with a ternary assembly which  
211 accommodates one copy each of TAF11, TAF13 and TBP in the complex.

### 212 **TAF11/TAF13 interacts with the concave DNA-binding surface of TBP**

213 With the objective to elucidate the nature of the TAF11/TAF13 interaction with TBP, and to  
214 provide direct evidence that TAF11/TAF13 indeed engages the DNA-binding concave  
215 surface of TBP, we performed hydrogen-deuterium exchange/mass spectrometry (HDX-MS)  
216 (Rajabi et al. 2015) experiments (Figure 2D, Table 3). We analysed unbound TAF11/TAF13  
217 and TAF11/TAF13/TBP, respectively, and compared changes in the deuteration levels in  
218 proteolytic peptides by MS indicating the level of protection of the respective regions in  
219 TAF11, TAF13 or TBP, respectively, upon ternary complex formation. The HDX-MS results  
220 underscored that the DNA binding surface of TBP was recognized by TAF11/TAF13,  
221 evidenced by decrease in deuteration levels which corresponds to increased protection from  
222 the solvent of peptides located in the concave surface of TBP upon TAF11/TAF13 binding.  
223 The extent of protection within TBP further indicates that the binding of TAF11/TAF13  
224 engages both symmetric pseudo-repeats in TBP, thus spanning the entire concave interface  
225 (Figure 2D). Interestingly, we identified one peptide (AA residues 157-167) in TBP which  
226 evidenced an increased level of deuteration upon TAF11/TAF13/TBP complex formation in  
227 the HDX-MS experiments (Figure 2D). This peptide is located at the dyad relating the two  
228 pseudo-symmetric repeats in TBP. We interpret this result as an indication that this particular  
229 region within TBP is more protected in a presumed TBP dimer which dissociates when  
230 TAF11/TAF13 is binding and the 1:1:1 complex is formed. Our HDX-MS experiments  
231 provide direct evidence that TAF11/TAF13 engage to the concave DNA-binding surface of  
232 TBP, in excellent agreement with our above described biochemical experiments involving  
233 TAF11/TAF13, TBP, AdMLP DNA and TAF1-TAND.

## 234 **Architecture of the TAF11/TAF13/TBP complex**

235 We proceeded to determine the architecture of the TAF11/TAF13/TBP complex by using a  
236 comprehensive, integrative multi-parameter approach. We utilized the available crystal  
237 structure of TBP (Nikolov et al. 1992) as well as the crystal structure of the globular histone-  
238 fold containing domains of the TAF11/TAF13 dimer (Birck et al. 1998) in our approach, and  
239 combined these atomic coordinates with our native MS, SAXS, AUC and HDX-MS results.  
240 We acquired distance constraints to define our structural model by carrying out cross-  
241 linking/mass-spectrometry (CLMS) experiments using two different approaches. We first  
242 carried out a series of CLMS experiments using the cross-linker  
243 bis(sulfosuccinimidyl)suberate (BS3) (Figure 3–Figure Supplement 1; Table 4). BS3 cross-  
244 links primary amines on the side chain of lysine residues and the N-terminus of polypeptide  
245 chains. Inclusion of the BS3 CLMS derived distance constraints into our calculation already  
246 evidenced that the TAF11/TAF13 engaged the concave DNA-binding surface of TBP. In  
247 addition, we carried out site-specific UV-induced CLMS experiments utilizing MultiBacTAG  
248 (Koehler et al. 2016), a method we recently developed to unlock protein complex chemical  
249 space (Figure 3–Figure Supplement 2). MultiBacTAG relies on genetic code expansion  
250 (GCE) and employs a modified MultiBac baculoviral genome into which we engineered  
251 expression cassettes encoding for the orthogonal pyrolysine tRNA (tRNA<sup>Py<sup>l</sup></sup>) / tRNA  
252 synthetase (PylRS) pair from *Methanosarcina mazei*. Infection of insect cell cultures with a  
253 MultiBacTAG virus containing TAF11/TAF13 mutants harboring an AMBER stop codon  
254 resulted in efficient incorporation of the UV-activatable amino acid diazirin lysine (DiAzK)  
255 provided in the culture medium, leading to site-specific cross-links upon UV irradiation of  
256 the reconstituted complex (Koehler et al. 2016) (Figure 3–Figure Supplement 2).

257 Our final three-dimensional TAF11/TAF13/TBP ternary complex model  
258 accommodated more than 90% of all experimental constraints and evidenced a tight

259 association of the TAF11/TAF13 histone-fold regions with the concave surface of TBP,  
260 giving rise to a compact structure (Figure 3, Figure 3–Figure Supplement 3). To validate our  
261 approach, we carried out calculations using alternative starting models. For instance, we  
262 rotated TBP by 180° around its axes to artificially expose the convex surface to  
263 TAF11/TAF13, or, alternatively, to reverse the location of the N- and C-terminal stir-ups of  
264 TBP (data now shown). These alternative calculations were far inferior in accommodating  
265 experimental spatial and distance restraints, in addition to being inconsistent with our  
266 biochemical data, thus substantiating our TAF11/TAF13/TBP structural model.

267 **A highly conserved domain within TAF13 is required for TAF11/TAF13 interaction**  
268 **with TBP and for supporting cell growth.**

269 In our TAF11/TAF13/TBP complex, the HF domains of TAF11 and TAF13 invade the  
270 concave DNA binding surface of TBP. Moreover, the structural model conveys that the C-  
271 terminal extension abutting the histone fold domain of TAF13 may play a prominent role in  
272 stabilizing the interaction with TBP. We analyzed TAF13 primary sequences from yeast to  
273 human (Figure 4). Sequence alignments revealed a very high degree of sequence  
274 conservation in this C-terminal TAF13 domain, with key residues virtually identical in all  
275 TAF13 proteins analyzed (Figure 4A). Based on our observation, we mutated these signature  
276 residues in the human TAF13 C-terminal region and analyzed the effect of the mutations on  
277 TAF11/TAF13/TBP complex formation. In particular, we analyzed two TAF13 mutants, A  
278 and B (Figure 4). In Mutant A, we substituted with alanine conserved residues located in the  
279 center of the TAF11/TAF13/TBP interface, while in Mutant B we changed conserved amino  
280 acid residues located more to the periphery (Figure 4 – Figure Supplement 1A). Both TAF13  
281 mutants readily formed dimers with TAF11. SEC experiments evidenced impairment of TBP  
282 interaction with both mutants, but with notable differences. In case of Mutant A, TBP  
283 interaction was completely abolished and the TAF11/TAF13/TBP complex was not detected.

284 In case of Mutant B, on the other hand, TBP interaction was likewise diminished, however,  
285 residual TAF11/TAF13/TBP complex formation was clearly observed (Figure 4B). These  
286 results provide evidence for a C-terminal TBP interaction domain (CTID) in TAF13, which is  
287 highly conserved throughout evolution. As the human TAF13 CTID is very well conserved,  
288 we generated two mutants in *Saccharomyces cerevisiae* (sc) Taf13 CTID that were mutating  
289 the same amino acid residues that were deleterious in the human TAF11/TAF13/TBP  
290 complex interactions. With plasmids expressing these scTaf13 mutants (scMutant A and  
291 scMutant B) we carried out *in vivo* rescue experiments in yeast, using previously described  
292 temperature sensitive *Taf13* mutant strains (Shen et al. 2003; Lemaire et al. 2000). While  
293 plasmids expressing either wild type (WT) or Mutant B Taf13 proteins supported growth at  
294 the non-permissive temperature (both on solid media and in suspension cell culture at close to  
295 wild-type levels), Mutant A did not rescue the lethal phenotype at 37°C, evidencing that the  
296 conserved mutations in this mutant effectively arrested cell growth (Figure 4C).

297 We corroborated our results by means of a novel Taf13 degron yeast strain (Warfield  
298 et al. 2017). In this strain, endogenous Taf13 is fused to an auxin-inducible degron (AID) tag  
299 resulting in Taf13-AID depletion upon addition of a chemical, indole-3-acetic acid (IAA). In  
300 excellent agreement with the ts strain experiments, the plasmids expressing wild-type or  
301 Mutant B Taf13 supported growth after IAA addition, while expression of Mutant A led to  
302 cell growth arrest (Figure 4D). Thus, our observations consistently suggest that the amino  
303 acids in TAF13 CTID, which when mutated destroy TAF11/TAF13 interactions with TBP,  
304 are required for functional TFIID formation.

### 305 **Co-immunoprecipitation experiments reveal cytoplasmic TAF11/TAF13 and TBP** 306 **dynamics in nuclear holo-TFIID**

307 We recently demonstrated that human TFIID assembly involves preformed cytosolic and  
308 nuclear submodules (Trowitzsch et al. 2015), and we now asked whether the human

309 TAF11/TAF13/TBP complex would likewise represent such a sub-assembly. To this end we  
310 performed co-immunoprecipitations (co-IPs) from HeLa cell cytosolic and nuclear extracts  
311 using an anti-TAF11 antibody (Figure 5). We found dimeric TAF11/TAF13 complex in the  
312 cytosol representing the complete HF pair. We could not detect TBP in cytosolic co-IPs,  
313 however, our experiments evidenced TAF7 association with cytoplasmic TAF11/TAF13. The  
314 anti-TAF11 co-IP from nuclear extract, in contrast, contained all TFIID components.  
315 Surprisingly, normalized spectral abundance factor (NSAF) (Zybailov et al. 2007) analyses of  
316 several distinct anti-TFIID IPs (i.e. anti-TAF1 and anti-TAF7) from NE indicate that less  
317 than half of the nuclear TFIID specimens appear to contain stably bound TBP, implying  
318 considerable dynamics in TBP association with TFIID in the nucleus, possibly regulated by  
319 TBP containing TFIID submodules such as TAF11/TAF13/TBP.  
320

## 321 **DISCUSSION**

322 Given the central role of TBP in eukaryotic transcription, it is not surprising that the activity  
323 of TBP is highly regulated, both positively and negatively, by GTFs, cofactors and gene-  
324 specific activators. In addition to TFIIA, a number of protein factors were identified to  
325 regulate the DNA binding capability of TBP. Several of these factors interact directly with  
326 the concave DNA binding surface and are capable of displacing TATA-box containing  
327 promoter DNA. The structures of the TAF1 N-terminal domains from *Drosophila* and yeast  
328 were determined, exhibiting TATA-box mimicry when bound to TBP (Figure 6, Figure 6–  
329 Figure Supplement 1). TBP and BTAF1 in mammals, or TBP and Mot1p in yeast, form a  
330 heterodimeric complex called B-TFIID (Auble and Hahn 1993). Mot1p was shown to utilize  
331 a flexible loop to target the DNA-binding surface of TBP thus precluding TATA-DNA  
332 binding (Wollmann et al. 2011). In our present study, we analyzed the interactions amongst  
333 TAF11/TAF13, TBP, TFIIA and TATA-box containing promoter DNA. TAF11 and TAF13  
334 form a tight dimeric complex held together by pairing of the histone fold domains contained  
335 within these TAFs (Birck et al. 1998). Existing data conveyed a putative  
336 TAF11/TAF13/TFIIA/TBP/DNA complex which may represent a molecular building block  
337 in early stage preinitiation complex formation. In marked contrast to previous reports, our  
338 careful and well-calibrated titration of TAF11/TAF13 to preformed TFIIA/TBP/DNA did not  
339 result in a stabilization of the TFIIA/TBP/DNA complex. Rather, we observed that titration  
340 of TAF11/TAF13 resulted in the binding of TAF11/TAF13 to TBP and the release of free  
341 promoter DNA. Dissection of the underlying molecular interactions revealed a stable ternary  
342 complex comprising the TAF11/TAF13 HF pair and TBP. Our comprehensive multi-  
343 parameter approach revealed a compact 3-D structure in which TAF11/TAF13 bound tightly  
344 to the concave DNA-binding surface of TBP, fully consistent with our observations that  
345 TAF11/TAF13 could displace TATA-box containing DNA from a TBP/DNA complex. In

346 addition, we identified in our experiments a novel C-terminal domain within TAF13 that is  
347 essential for binding to TBP, and moreover markedly conserved throughout evolution. We  
348 generated TAF13 mutants and could demonstrate that mutations of key residues within this  
349 highly conserved domain, while not perturbing TAF13/TAF11 interactions in our  
350 experiments, had a profound effect on TBP binding *in vitro* and cell growth *in vivo*,  
351 effectively resulting in cell growth arrest. Taken together, our results indicate that the  
352 interaction of TAF11/TAF13 with TBP supports viability. Furthermore, we also  
353 demonstrated that TAF1-TAND and TAF11/TAF13 can compete for TBP binding. In  
354 summary, we provide compelling evidence that TAF11/TAF13, TATA-box DNA and TAF1-  
355 TAND share the same interaction interface in TBP. Careful inspection of the molecular  
356 modes by which different interactors engage the concave DNA-binding surface of TBP  
357 reveals that TAF11/TAF13 is unique in spanning the entire concave groove including the stir-  
358 ups of the saddle-shape adopted by TBP, with a solvent-excluded surface comparable to  
359 TATA-box DNA binding to TBP (Figure 6, Table 5).

360 Holo-TFIID is thought to exist in distinct structural states, based on cryo-EM analyses  
361 (Cianfrocco et al. 2013; Louder et al. 2016). In the canonical state, TAF1 is proposed to  
362 associate via its TAND domain to the DNA-binding surface of TBP thereby inhibiting  
363 TBP/TFIID binding to TATA-box containing core promoter DNA. In the activated state,  
364 TFIID was proposed to undergo major conformational rearrangements, likely involving  
365 interactions with transcriptional activators, thus unmasking TBP to promote DNA binding  
366 stabilized by TFIIA initiating transcription. Our results suggest that, in TFIID, several distinct  
367 TBP/TAF interactions exist, which are formed to forestall unwanted TFIID/DNA interactions  
368 which could otherwise lead for instance to cryptic transcription initiation on genomic regions  
369 that do not contain promoter elements. In addition to the TAF1-dependent inhibited canonical  
370 state, we propose an alternative inhibitory TFIID state in which the TAF11/TAF13 HF pair



371 blocks TBP from binding TATA-box containing promoter DNA (Figure 7). This alternative  
372 inhibited state may serve as a further point of transcriptional control, possibly depending on  
373 promoter context or additional gene regulatory factors bound. Our results imply that, in a  
374 given TFIID complex, the TAF1-dependent and the TAF11/TAF13 HF pair-dependent TBP  
375 blocking activities are mutually exclusive, but they may compete with each other to ascertain  
376 full blocking activity. Interestingly however, it appears that this TAF11/TAF13 HF pair-  
377 dependent TBP binding/blocking activity is essential/required for normal TFIID function,  
378 because when we interfered in the TBP binding through mutating the CTID, yeast growth  
379 was compromised at the non-permissive conditions. Thus, it is not clear at the moment  
380 whether or not the TAF1-dependent and the TAF11/TAF13 HF pair-dependent TBP blocking  
381 activities are really competing with each other, or would be simply part of a step-wise TFIID  
382 conformational change, or “activation”, process that would allow TFIID to bind to DNA only  
383 when open promoter structures would become available. Further experiments will be needed  
384 to answer these exciting questions. Transcription activators and chromatin remodeling factors  
385 may direct inhibited TFIID to specific promoters, which could be poised to be transcribed by  
386 histone H3K4 trimethylation, and alleviate the TBP-blocking through TAF-interactions or by  
387 TAF-chromatin mark interactions. Alternatively, it is conceivable that once TFIID is brought  
388 to a promoter by interactions with transcription activators and positive chromatin marks (i.e.  
389 histone H3K4me3), DNA and TFIIA together may synergize to liberate the TATA-box  
390 binding surface of TBP from the inhibitory TAF-interactions.

391 The general roles of individual TAFs and the holo-TFIID complex are increasingly  
392 better understood, the mechanisms by which the cell assembles this essential multiprotein  
393 complex however remains largely enigmatic. The existence of discrete TFIID subassemblies  
394 containing a subset of TAFs, such as nuclear core-TFIID and the TAF2/TAF8/TAF10  
395 complex present in the cytoplasm, provides evidence that holo-TFIID may be assembled in a

396 regulated manner in the nucleus from preformed submodules (Bieniossek et al. 2013; Gupta  
397 et al. 2016; Trowitzsch et al. 2015). We analyzed TAF11-containing complexes by co-IP  
398 experiments from the cytoplasm and the nucleus of HeLa cells. In cytosolic co-IPs, we  
399 identified the TAF11/TAF13 histone fold pair, suggesting that this TFIID submodule may  
400 also be preformed in the cytoplasm (Figure 5). Note however that this cytoplasmic  
401 TAF11/TAF13 building block did not contain detectable amounts of TBP in our experiments,  
402 suggesting that trimeric TAF11/TAF13/TBP, within TFIID or as a discrete TFIID  
403 submodule, would be formed in the nucleus. Interestingly, we also identified TAF7  
404 associated with TAF11/TAF13 in the cytoplasm, hinting at putative novel interactions  
405 between TAF11/TAF13 and TAF7. TAF1 forms stable complexes with both TAF7 and TBP  
406 (Gupta et al. 2016). We speculate that cytoplasmic TAF7/TAF11/TAF13 may represent an  
407 assembly intermediate towards a TAF1/TAF7/TAF11/TAF13/TBP module, which may  
408 integrate into a core-TFIID and TAF2/TAF8/TAF10 containing “8TAF” assembly  
409 (Trowitzsch et al. 2015) in the formation pathway to the complete nuclear holo-TFIID  
410 complex. In this TAF1/TAF7/TAF11/TAF13/TBP module, TBP would be tightly bound to  
411 either TAF1 or TAF11/TAF13, which could serve to ascertain that this putative TFIID  
412 submodule is efficiently blocked from any potentially detrimental interactions with DNA  
413 until holo-TFIID formation is completed.

414 In the nucleus, IPs utilizing antibodies against several different TFIID specific TAFs  
415 co-precipitated all known TFIID subunits, although with variable stoichiometry. Strikingly,  
416 stoichiometry analyses carried out by NSAF calculations of our nuclear anti-TAF IPs  
417 indicated that TBP was only present in less than half of the TFIID specimens, when  
418 compared to TAF1 or TAF7 for example, suggesting that TFIID-type complexes may exist  
419 which do not contain TBP. TBP is thought to be highly mobile structurally in the context of  
420 holo-TFIID, with recent cryo-EM studies predicting large-scale migration of TBP within

421 distinct TFIID conformational states (Cianfrocco et al. 2013; Louder et al. 2016). Our  
422 observations point to an additional level of compositional TBP and/or TAF dynamics in  
423 TFIID formation, raising the interesting possibility that the accretion of TBP in holo-TFIID  
424 may be regulated by partially assembled nuclear TFIID building blocks including for instance  
425 the TAF11/TAF13/TBP complex we identified.  
426

427 **METHODS**

428 **DNA constructs.** TAF11, TAF13 and TAF1-TAND were cloned in MultiBac  
429 baculovirus/insect cell transfer plasmids (Berger et al. 2004; Fitzgerald et al. 2006) and  
430 TBP<sup>fl</sup>, TBP<sup>c</sup> and TFIIA<sup>s-c</sup> expression constructs were cloned in *E. coli* expression plasmids.  
431 Constructs for genetic code expansion using the MultiBacTAG system were generated by  
432 PCR as described (Koehler et al. 2016). All constructs were verified by DNA sequencing.

433 Coding sequences of full-length TAF11 (Uniprot accession number Q15544) and  
434 TAF13 (Uniprot accession code Q15543) were synthesized at GenScript (New Jersey, USA).  
435 TAF11 contained an N-terminal hexahistidine tag spaced by a restriction site for Tobacco  
436 Etch Virus (TEV) NIA protease. TAF13 was cloned into MCS1 of the pFL acceptor plasmid  
437 from the MultiBac(Berger et al. 2004) suite via restriction sites NsiI and XhoI. TAF11 was  
438 inserted into MCS2 of the pFL-TAF13 plasmid via restriction sites RsrII and EcoRI.

439 The coding sequences for TFIIA  $\alpha$  (AA2-59; Uniprot accession number P52655),  
440  $\beta$  (AA302-376; Uniprot accession number P52655) and  $\gamma$  (AA2-110; Uniprot accession  
441 number P52657) were arranged into a single open reading frame by adding DNA sequences  
442 encoding for linkers L1(-DGKNTANSANTNTV-) and L2(-SRAVDGELFDT-). A C-  
443 terminal hexahistidine-tag was added to facilitate purification. The complete coding sequence  
444 was inserted into the bacterial expression plasmid pET28a via restriction sites NcoI and XhoI.

445 TBP full-length (UniProt accession number P20226) was synthesized (Genscript,  
446 New Jersey) and cloned via restriction enzymes NdeI and KpnI into a pET28a plasmid  
447 containing a hexahistidine-tag with a TEV cleavage site. TBP core (AA 155-335, UniProt  
448 accession number P20226) was generated from this plasmid by polymerase chain reaction  
449 (PCR).

450 The TAF1-TAND coding sequence (AA 26-168; UniProt accession number P21675)  
451 was cloned into a modified pUCDM vector coding for an engineered N-terminal TEV-

452 cleavable maltose-binding protein (MBP) tag using sequence and ligation independent  
453 cloning (SLIC) (Li and Elledge 2007).

454 **Preparation of TAF11/TAF13 complex.** The human TAF11/TAF13 complex was co-  
455 expressed in Sf21 insect cells using the MultiBac system (Berger et al. 2004). DNA encoding  
456 for an N-terminal hexa-histidine tag and a protease cleavage site for tobacco etch virus (TEV)  
457 NIa protease was added to the 5' end of the TAF11 open reading frame and cloned into pFL  
458 plasmid (Berger et al. 2004). Cells were resuspended in Talon Buffer A (25mM Tris pH 8.0,  
459 150mM NaCl, 5mM imidazole with complete protease inhibitor (Roche Molecular  
460 Biochemicals). Cells were lysed by freeze-thawing (3 times), followed by centrifugation at  
461 40,000g in Ti70 rotor for 60 min to clear the lysate. TAF11/TAF13 complex was first bound  
462 to talon resin, pre-equilibrated with Talon Buffer A, followed by washes with Talon Buffer  
463 A, then Talon Buffer HS (25mM Tris pH 8.0, 1M NaCl, 5mM imidazole and complete  
464 protease inhibitor) and then again Talon Buffer A. TAF11/TAF13 complex was eluted using  
465 Talon Buffer B (25mM Tris pH 8.0, 150mM NaCl, 200mM imidazole and complete protease  
466 inhibitor). Fractions containing the TAF11/TAF13 complex were dialyzed overnight against  
467 HiTrapQ Buffer A (50mM Tris pH 8.0, 150mM NaCl, 5mM  $\beta$ -ME and complete protease  
468 inhibitor). Complex was further purified using ion exchange chromatography (IEX) with a  
469 HiTrapQ column pre-equilibrated with HiTrapQ Buffer A. After binding, column was  
470 washed with HiTrapQ Buffer A and TAF11/TAF13 eluted using a continuous gradient of  
471 HiTrapQ Buffer B (50mM Tris pH 8.0, 1M NaCl, 5mM  $\beta$ -ME and complete protease  
472 inhibitor) from 0-50%, followed by a step gradient to 100%. The complex was further  
473 purified by size exclusion chromatography (SEC) with a SuperdexS75 10/300 column in SEC  
474 buffer (25mM Tris pH 7.5, 300 mM NaCl, 1mM EDTA, 1mM DTT and complete protease  
475 inhibitor). Mutants of TAF13 were generated by self-SLIC reaction (Haffke et al. 2013) and  
476 complexes expressed and purified as wild-type.

477 **Preparation of TBP.** Full-length human TBP with an N-terminal oligo-histidine tag was  
478 expressed in *E. coli* BL21 (DE3) STAR cells at 30°C. Cells were lysed in Talon Buffer A by  
479 using a French press. Lysate was cleared by centrifugation at 40,000 g for 60 min. TBP<sup>fl</sup> was  
480 eluted from TALON resin with Talon Buffer B using a continuous gradient. The tag was  
481 removed by TEV protease cleavage during dialysis overnight into Dialysis Buffer (25mM  
482 Tris pH 8.0, 300 mM NaCl, 5mM  $\beta$ -ME) and a reverse IMAC step was used to remove  
483 uncleaved protein. TBP<sup>fl</sup> was polished using a SuperdexS75 16/60 equilibrated in SEC  
484 Buffer. The conserved TBP core (TBP<sup>c</sup>) was expressed in *E. coli* Rosetta (DE3) cells at 18°C  
485 and purified as described for TBP<sup>fl</sup>.

486 **Preparation of double-stranded TATA-box containing promoter DNA substrate.**  
487 AdMLP) TATA-DNA was prepared from synthetic oligonucleotides d(ctgctataaaaggctg) and  
488 d(cagccttttatagcag) (BioSpring GmbH) by mixing the complementary strands in equimolar  
489 amounts in Annealing Buffer (10 mM Tris pH 8.0, 50mM KCl, 5mM MgCl<sub>2</sub>), heating to  
490 96°C for 2 min and slow-cooling to room temperature.

491 **Design and production of TFIIA<sup>s-c</sup>.** A construct encoding human TFIIA was prepared by  
492 structure-based design starting from the TFIIA/TBP/DNA structure (PDB ID 1NVP) by  
493 introducing a linker (L1) with sequence DGKNTANSANTNTVP between the TFIIA  $\gamma$  chain  
494 and the  $\alpha$  chain. Similarly, a second linker (L2) with sequence SRAVDGELFDT was  
495 introduced connecting the  $\alpha$  chain with the  $\beta$  chain giving rise to a single-chain TFIIA<sup>s-c</sup>  
496 construct  $\gamma$ -L1- $\alpha$ -L2- $\beta$  encompassing 240 amino acid residues in total. The gene encoding for  
497 TFIIA<sup>s-c</sup> was cloned in a pET28a plasmid resulting in frame with a C-terminal hexa-histidine  
498 tag. TFIIA<sup>s-c</sup> was expressed in *E. coli* BL21 (DE3) cells at 18°C. Cells were lysed using a  
499 French press in Binding Buffer (20 mM Tris-HCl pH 7.4, 150 mM NaCl and complete  
500 protease inhibitor). The lysate was cleared by centrifugation at 40,000g for 45 min, and

501 loaded on a Talon affinity column. After 10 column volumes of washing with Binding  
502 Buffer, TFIIA<sup>s-c</sup> was eluted using Elution Buffer (20 mM Tris-HCl pH 7.4, 150 mM NaCl  
503 and 250 mM imidazole). Eluted protein was dialyzed overnight in 20mM Tris-HCl pH 7.4,  
504 150mM NaCl, 0.5mM EDTA and 1mM DTT and loaded onto a Heparin column. TFIIA<sup>s-c</sup>  
505 was eluted with HS Buffer (20mM Tris-HCl pH 7.4, 1M NaCl, 0.5mM EDTA and 1mM  
506 DTT) applying a gradient, and polished by SEC with a Superdex75 column equilibrated in  
507 SEC Buffer 2 (20mM Tris-HCl pH 7.4, 150mM NaCl, 0.5mM EDTA and 1mM DTT).  
508 Purified TFIIA<sup>s-c</sup> protein was aliquoted and stored in Storage Buffer (20mM Tris pH 8.0,  
509 1mM DTT, 0.5mM EDTA and 150mM NaCl) at -80°C.

510 **X-ray crystallography.** Large crystals of TFIIA<sup>s-c</sup> were obtained by vapor diffusion at room  
511 temperature from a protein solution concentrated to 15mg/ml in Storage Buffer and  
512 equilibrated against 20 mM Tris pH 8.0 with 25 mM NaCl in the reservoir. Best crystals were  
513 obtained by streak-seeding with the TFIIA<sup>s-c</sup> crystals spontaneously formed in the Eppendorf  
514 tube used for storing the protein. Crystals were harvested and mounted using  
515 perfluoropolyether (PFO-X175/08) as cryo-protectant. X-ray diffraction data were collected  
516 using a Pilatus 6M detector at beamline ID29 at the European Synchrotron Radiation Facility  
517 (ESRF). TFIIA<sup>s-c</sup> crystals diffracted to 2.4Å resolution. Data were processed using XDS  
518 (Kabsch 2010). The structure was determined by molecular replacement (MR) utilizing  
519 software PHASER (McCoy 2007), with the TFIIA crystal coordinates from the human  
520 TBP/TFIIA/TATA-DNA structure (Bleichenbacher et al. 2003) used as a search model.  
521 Iterative cycles of refinement and model building were performed using REFMAC5 and  
522 COOT from the CCP4 suite (Winn et al. 2011). Residues 2-210 could be modeled  
523 unambiguously in the electron density maps. Refinement converged at R and R<sub>free</sub> values of  
524 0.18 and 0.24, respectively. Refinement statistics are provided in Table 1. TFIIA<sup>s-c</sup>  
525 coordinates and structure factors were submitted to the PDB (5M4S).

526 **Band shift assay.** Samples for electrophoretic mobility shift assay were prepared by mixing  
527 annealed dsDNA (2  $\mu$ M) with TBP<sup>c</sup> (4  $\mu$ M) or TBP<sup>fl</sup> (4  $\mu$ M), respectively, and TFIIA<sup>s-c</sup>  
528 (6 $\mu$ M) in EMSA Reaction Buffer (10mM Tris pH 8.0, 60mM KCl, 10mM MgCl<sub>2</sub>, 10%  
529 glycerol, 2.5mM DTT). Purified TAF11/TAF13 was added to aliquots of this mix at  
530 increasing concentrations (2  $\mu$ M to 64  $\mu$ M) followed by 1.5 hour incubation on ice. Samples  
531 were analysed by non-denaturing 5% polyacryl-amide gel electrophoresis (PAGE) using  
532 EMSA Running Buffer (25 mM Tris, 190 mM Glycine, 5 mM Mg Acetate, pH 8.0). Gels  
533 were stained with ethidium bromide (EtBr).

534 **Preparation of TAF11/TAF13/TBP complex.** TAF11/TAF13 (wild-type and mutants) was  
535 mixed with TBP in a 1:1.1 molar ratio in Complex Reaction Buffer (25mM Tris pH 8.0, 300  
536 mM NaCl, 1mM EDTA, 1mM DTT, Leupeptin, Pepstatin and complete protease inhibitor)  
537 and incubated on ice for 90 min, followed by SEC with a SuperdexS200 10/300 column pre-  
538 equilibrated in Reaction Buffer.

539 **Analytical ultracentrifugation.** Purified TAF11/TAF13/TBP complex was analysed by  
540 analytical ultracentrifugation (AUC) in an An-60Ti rotor in a Beckman XL-I analytical  
541 ultracentrifuge (Beckman Coulter) at 42,000 rpm at 10°C for 16 h. Data was analysed with  
542 software Sedfit (Schuck 2000).

543 **Native mass spectrometry.** Proteins and complexes were buffer exchanged into 150 mM  
544 ammonium acetate pH7.5 before MS analysis using Vivaspin 10 kDa MWCO (Sartorius,  
545 Goettingen, Germany). 2 ul of the protein solution was then nano-electrosprayed from a gold  
546 coated borosilicate glass capillaries made in the Robinson lab (Hernandez and Robinson  
547 2007). All mass spectrometry measurements were performed on a QToF instrument  
548 optimized for high mass measurements in positive ion mode. MS spectra were recorded at  
549 capillary and cone voltages of 1.7 kV and 80 V respectively. Other instrument parameters



550 were ToF pressure  $1.76 \times 10^6$  mbar and analyser pressure of  $2 \times 10^4$  mbar. For the collision  
551 induced dissociation the collision energy was increased up to 100 V to induce dissociation.  
552 All mass spectra were calibrated using an aqueous solution of caesium iodide and data were  
553 processed using MassLynx software V4.1.

554 **TAF1-TAND production and competition assay.** Human TAF1-TAND (Liu et al. 1998;  
555 Mal et al. 2004) containing an N-terminal maltose-binding protein (MBP) tag was expressed  
556 in Sf21 insect cells using MultiBac (Berger et al. 2004). Cells were lysed in MBP Binding  
557 Buffer (20mM Tris pH 8.0, 300mM NaCl, 1mM EDTA, 1mM DTT, complete protease  
558 inhibitor) by freeze-thawing, followed by centrifugation at 20,000 rpm in a JA25.5 rotor for  
559 45 min. MBPTAF1-TAND was bound to amylose resin pre-equilibrated in MBP Binding  
560 Buffer, followed by extensive washing (20 column volumes). MBPTAF1-TAND loaded resin  
561 was incubated with an excess of preformed TAF11/TAF13/TBP complex for 60 min at 4°C.  
562 The column was washed and flow-through as well as wash fractions were collected. Bound  
563 protein(s) were eluted using MBP Elution buffer (20mM Tris pH 8.0, 300mM NaCl, 1mM  
564 EDTA, 1mM DTT, 10mM Maltose, complete protease inhibitor). Samples were analysed by  
565 SDS-PAGE followed by staining with Coomassie Brilliant Blue (Sigma Aldrich).

566 **Small-angle X-ray scattering experiments.** Small-angle X-ray scattering (SAXS)  
567 experiments were carried out at the ESRF BioSAXS beamline BM29 (Pernot et al. 2013).  
568 30µl of each of purified TAF11/TAF13/TBP, TAF11/TAF13 and TBP at a range of  
569 concentrations (Table 2) and SAXS Sample Buffer (25mM Tris pH 8.0, 300 mM NaCl, 1mM  
570 EDTA, 1mM DTT and complete protease inhibitor) were exposed to X-rays and scattering  
571 data collected using the robotic sample handling available at the beamline. Ten individual  
572 frames were collected for every exposure, each 2 seconds in duration, using the Pilatus 1M  
573 detector (Dectris AG). Data were processed with the ATSAS software package (Petoukhov et

574 al. 2012). Individual frames were processed automatically and independently within the  
575 EDNA framework (Incardona et al. 2009), yielding individual radially averaged curves of  
576 normalized intensity versus scattering angle  $S=4\pi\sin\theta/\lambda$ . Additional data reduction within  
577 EDNA utilized the automatic data processing tools of ATSAS software package, to combine  
578 timeframes, excluding any data points affected by aggregation induced by radiation damage,  
579 yielding the average scattering curve for each exposure series. Matched buffer measurements  
580 taken before and after every sample were averaged and used for background subtraction.  
581 Merging of separate concentrations and further analysis steps were performed manually using  
582 PRIMUS (Petoukhov et al. 2012). Forward scattering ( $I(0)$ ) and radius of gyration ( $R_g$ ) were  
583 calculated from the Guinier approximation, to compute the hydrated particle volume using  
584 the Porod invariant and to determine the maximum particle size ( $D_{max}$ ) from the pair  
585 distribution function computed by GNOM (Petoukhov et al. 2012). 40 *ab initio* models were  
586 calculated for each sample, using DAMMIF (Petoukhov et al. 2012), and then aligned,  
587 compared and averaged (evidencing minimal variation) using DAMAVER (Petoukhov et al.  
588 2012). The most representative model for TAF11/TAF13/TBP and TAF11/TAF13 selected  
589 by DAMAVER were compared to each other as well as the known structure of TBP, with  
590 overlays of the resulting models generated in PyMOL. The fits to the experimental data of the  
591 models and the theoretical scattering of the calculated structures were generated with  
592 CRY SOL (Petoukhov et al. 2012).

### 593 **Cross-linking/mass spectrometry (CLMS) experiments.**

594 **BS3 cross-linking:** Purified TAF11/TAF13/TBP and TAF11/TAF13 complexes were cross-  
595 linked separately by BS3 at complex/BS3 ratio of 1:25 [w/w] in Cross-linking Buffer (25mM  
596 HEPES, pH 8.0, 300 mM NaCl, 1mM DTT, 1 mM EDTA and complete protease inhibitor)  
597 for 2 h on ice. The reaction was quenched by adding saturated ammonium bicarbonate  
598 solution followed by incubation on ice (45 min). Cross-linked samples were then further

599 purified by injecting on a SuperdexS200 10/300 column. Peak fractions containing purified  
600 cross-linked samples were concentrated using pin concentrators (Amicon) and separated by  
601 SDS-PAGE using a NuPAGE 4-12% bis-Tris gel (Thermo Fisher Scientific).

602 The gel bands corresponding to cross-linked complexes were reduced, alkylated and  
603 trypsin digested following standard procedures (Maiolica et al. 2007) and digested peptides  
604 were desalted using C18 StageTips (Rappsilber et al. 2007). Peptides were analysed on an  
605 LTQ Orbitrap Velos mass spectrometer (Thermo Fisher Scientific) that was coupled with a  
606 Dionex Ultimate 3000 RSLC nano HPLC system. The column with a spray emitter (75- $\mu$ m  
607 inner diameter, 8- $\mu$ m opening, 250-mm length; New Objectives) was packed with C18  
608 material (ReproSil-Pur C18-AQ 3  $\mu$ m; Dr Maisch GmbH, Ammerbuch-Entringen, Germany)  
609 using an air pressure pump (Proxeon Biosystems) (Ishihama et al. 2002). Mobile phase A  
610 consisted of water and 0.1% formic acid. Mobile phase B consisted of 80% acetonitrile and  
611 0.1% formic acid. Peptides were loaded onto the column with 2% B at 500 nl/min flow rate  
612 and eluted at 200 nl/min flow rate with two gradients: linear increase from 2% B to 40% B in  
613 90 minutes or 120 mins; then increase from 40% to 95% B in 11 minutes. The eluted peptides  
614 were directly sprayed into the mass spectrometer.

615 Peptides were analysed using a high/high strategy (Chen et al. 2010): both MS spectra  
616 and MS2 spectra were acquired in the Orbitrap. FTMS full scan spectra were recorded at  
617 100,000 resolution. The eight highest intensity peaks with a charge state of three or higher  
618 were selected in each cycle for fragmentation. The fragments were produced using CID with  
619 35% normalized collision energy and detected by the Orbitrap at 7500 resolution. Dynamic  
620 exclusion was set to 90s and repeat count was 1.

621 ***DiAzKs cross-linking:*** An unnatural amino acid, DiAzKs, was introduced at K34 position of  
622 TAF13 using genetic code expansion (GCE) we implemented recently in our  
623 baculovirus/insect cell system (MultiBacTAG) (Koehler et al. 2016). TAF11/TAF13-

624 K34DiAzKs was purified similarly as wild type. Briefly, TAF11/TAF13-K34DiAzKs (as  
625 well as wild type) and TBP were mixed in 1:1.25 molar ratio in Incubation Buffer (25mM  
626 Tris, pH 8.0, 300 mM NaCl, 1mM DTT, 1 mM EDTA and complete protease inhibitor) and  
627 incubated on ice for 2 h. Reactions were then split into 2 aliquots. One aliquot was UV  
628 irradiated for 15 minutes on ice using a 345 nm filter with an approximately 40 cm distance  
629 to the 1000 W lamp. Cross-linked samples were then separated on SDS-PAGE using a  
630 NuPAGE 4-12% bis-Tris gel (Thermo Fisher Scientific). Gel bands were processed as above  
631 for BS3 CLMS.

632 Peptides were analysed on an Orbitrap Fusion Lumos Tribrid mass Spectrometer  
633 (Thermo Fisher Scientific) coupled to a Dionex UltiMate 3000 RSLC nano HPLC system  
634 using a 75  $\mu$ m $\times$ 50cm PepMap EASY-Spray column (Thermo Fisher Scientific). Eluted  
635 peptides were directly sprayed into the mass spectrometer through EASY-Spray source  
636 (Thermo Fisher Scientific) and analysed using a high/high strategy (Chen et al. 2010): both  
637 MS spectra and MS2 spectra were acquired in the Orbitrap. MS1 spectra were recorded at  
638 120,000 resolution and peptides with charge state of 3 to 8 were selected for fragmentation at  
639 top speed setting. The fragments were produced using HCD with 30% normalized collision  
640 energy and detected by the Orbitrap at 15000 resolution. Dynamic exclusion was set to 60s  
641 and repeat count was 1. Peak lists were generated by MaxQuant (version 1.5.3.30) (Cox and  
642 Mann 2008) at default parameters except for “top MS/MS peaks per 100 Da” being set to  
643 100. Cross-linked peptides were matched to spectra using Xi software (ERI, Edinburgh).

644 **Hydrogen-deuterium exchange/mass spectrometry.** Hydrogen-deuterium exchange/mass  
645 spectrometry (HDX-MS) experiments were fully automated using a PAL autosampler (CTC  
646 Analytics). This controlled the start of the exchange and quench reactions, the proteolysis  
647 temperature (4 °C), the injection of the deuterated peptides, as well as management of the  
648 injection and washing valves; it also triggered the acquisition of the mass spectrometer and

649 HPLC and UPLC pumps. A Peltier-cooled box (4 °C) contained two Rheodyne automated  
650 valves, a desalting cartridge (Trap Acquity UPLC Protein BEH C18 2.1x5mm, Waters) and a  
651 UPLC column (Acquity UPLC BEH C18 1.7 $\mu$ m 1x100mm, Waters). HDX-MS reactions  
652 were carried out using either TAF11/TAF13 or TBP alone or in complex at a concentration of  
653 20  $\mu$ M. Deuteration was initiated by a 5-fold dilution of the protein samples (10  $\mu$ l) with the  
654 same buffer in D<sub>2</sub>O (40  $\mu$ l). The proteins were deuterated for 15 sec or 2 min at 4 °C. The  
655 exchange was quenched using 50  $\mu$ l of 200 mM glycine-HCl, pH 2.5 at 4 °C. The proteins or  
656 complexes were digested online with immobilized porcine pepsin (Sigma) and recombinant  
657 nepenthesin-1. The peptides were desalted for 6 min using a HPLC pump (Agilent  
658 Technologies) with 0.1% formic acid in water, at a flow rate of 100  $\mu$ l/min. Desalted peptides  
659 were separated using a UPLC pump (Agilent Technologies) at 50  $\mu$ l/min for 10 min with 15–  
660 70% gradient B (Buffer A: 0.1% formic acid in water; Buffer B: 0.1% formic acid in 95%  
661 acetonitrile), followed by 1 min at 100% B. The peptide masses were measured using an  
662 electrospray-TOF mass spectrometer (Agilent 6210) in the 300–1300 m/z range. Each  
663 deuteration experiment was conducted in triplicate. The Mass Hunter (Agilent Technologies)  
664 software was used for data acquisition. The HD Examiner software (Sierra Analytics) was  
665 used for HDX-MS data processing. Identification of peptides generated by the digestion was  
666 done as described previously (Giladi et al. 2016). Different proteases (pepsin, nepenthesin-1,  
667 nepenthesin-2, rhizopuspepsin) or their combinations were tested for protein digestion with  
668 pepsin-nepenthesin-1 pair providing the best digestion parameters and sequence coverage.

669 **Integrative multiparameter-based model building and refinement.** Initial models of the  
670 two component structures (TAF11/TAF13, TBP) were taken from the PDB (1BH8 and  
671 1CDW) (Birck et al. 1998; Nikolov et al. 1996). 1BH8 was extended to include a helix  
672 structure missing from the complete histone-fold domain as described before (Birck et al.  
673 1998). The structure of the complex was constructed in a two-stage workflow. Initially, a

674 model of the structured core of the complex was constructed by rigid body docking using the  
675 HADDOCK webserver (de Vries et al. 2010). The resulting complex structures and their  
676 scores were visually analysed against the SAXS data to select the highest scoring structure  
677 that fit within the SAXS envelopes.

678 The selected complex with the highest scores was then refined integrating the cross-  
679 linking data. The HADDOCK complex was used as an input to MODELLER 9.14 (Webb and  
680 Sali 2014) with the complete sequences (including loop structures). Observed cross-links  
681 were included as restraints in the refinement with a mean distance of 11.4 Å. Refinement was  
682 performed iteratively until more than 90% of all distance constraints could be accommodated  
683 while maintaining the fit to the SAXS envelope.

#### 684 **Cell growth experiments**

685 Yeast Taf13 wild-type (WT), as well as Mutant A and Mutant B, were cloned along with  
686 native promoters into the LEU2 (auxotrophic marker) containing plasmid pRS415 (Genscript  
687 Corp., Piscataway, NJ, USA) by using the BamHI and NotI restriction enzyme sites.  
688 Constructs thus generated were transformed into yeast strain BY4741 (comprising  
689 endogenous wild-type Taf13) as well as the temperature sensitive (ts) yeast strains TSA797  
690 (ts *taf13*) and TSA636 (ts *taf13*) (EuroSCARF, SRD GmbH, Germany). Transformed yeast  
691 containing the plasmids were restreaked onto selective media and grown at permissive (30°C)  
692 or non-permissive (37°C) temperatures, and plates imaged. To determine growth rates, ts  
693 strains transformed with empty vector or Taf13 expression plasmids were grown in liquid  
694 media at 37°C. In a separate experiment, the above constructs were transformed into a Taf13-  
695 AID auxin-inducible degron strain obtained from Steven Hahn (Warfield et al. 2017), and  
696 grown at 30°C in liquid media supplemented with 500µM indole-3-acetic acid (IAA) or an  
697 equivalent volume of DMSO (used to prepare IAA stocks). Empty degron strain was used as  
698 a negative control. Absorbance at 600nm was measured every hour for all cell growth

699 experiments. Three (ts strains) or two (degron strain) independent experiments were  
700 performed and data was normalized against the first time point taken. Average absorbance  
701 was plotted against time, standard errors of mean (SEM) were calculated over each data  
702 point.

703 For spot assays, overnight cultures of empty degron strain as well as degron strain  
704 transformed with Taf13 wild-type and mutant expression plasmids were washed and  
705 resuspended in milli-Q water to obtain identical densities. Serial 10-fold dilutions were  
706 spotted on solid media (YPD, or synthetic drop-out media -LEU) supplemented with 500 $\mu$ M  
707 IAA or DMSO, and incubated at 30°C for 48-72 hours.

708 **TFIID immunoprecipitation experiments.** HeLa cells were grown in suspension culture.  
709  $10^{11}$  cells were harvested by centrifugation and a nuclear extract was prepared according to a  
710 modified protocol (Dignam et al. 1983). Briefly, nuclei were prepared by resuspending the  
711 pellets in 4 packed cell volume (PCV) of 50 mM Tris-HCl, pH 7.9; 1 mM EDTA; 1 mM DTT  
712 and proteinase inhibitors and opening the cells with a Dounce-homogenizer. Nuclei were  
713 collected by centrifugation and lysed in 4 PCV of 50 mM Tris-HCl, pH 7.9; 25% glycerol;  
714 500 mM NaCl; 0.5 mM EDTA; 1 mM DTT and protease inhibitors by powerful strokes. The  
715 lysate was centrifuged at 50,000 g for 20 minutes. The supernatant was filtered and proteins  
716 precipitating in 30% (w/v)  $(\text{NH}_4)_2\text{SO}_4$  were pelleted. They were resuspended in 50 mM Tris-  
717 HCl, pH 7.9; 20% glycerol; 100 mM KCl; 5 mM  $\text{MgCl}_2$ ; 1 mM DTT and dialysed against the  
718 same buffer.

719 For immunoprecipitation. 200  $\mu$ l protein G-Sepharose (Pharmacia) was incubated with  
720 approximately 50  $\mu$ g of the different antibodies (as indicated). Washed antibody-bound beads  
721 were then mixed with 4 mg of pre-cleared HeLa cell nuclear extract and incubated overnight  
722 at 4°C. Antibody-protein G Sepharose bound protein complexes were washed three times  
723 with IP buffer (25 mM Tris-HCl pH 7.9, 10% (v/v) glycerol, 0.1% NP40, 0.5 mM DTT, 5

724 mM MgCl<sub>2</sub>) containing 0.5 M KCl and twice with IP buffer containing 100 mM KCl.  
725 Immunoprecipitated proteins were eluted from the protein G columns with 0.1 M glycine (pH  
726 2.5) and quickly neutralized with 2 M Tris-HCl (pH 8.8).

727 For analysis by mass spectrometry, samples were reduced, alkylated and digested  
728 with LysC and trypsin at 37°C overnight. They were then analysed using an Ultimate 3000  
729 nano-RSLC (Thermo Fischer Scientific) coupled in line with an Orbitrap ELITE (Thermo  
730 Fisher Scientific). Briefly, peptides were separated on a C18 nano-column with a linear  
731 gradient of acetonitrile and analysed in a Top 20 CID (Collision Induced Dissociation) data-  
732 dependent mass spectrometry. Data were processed by database searching using SequestHT  
733 (Thermo Fisher Scientific) with Proteome Discoverer 1.4 software (Thermo Fisher Scientific)  
734 against the Human Swissprot database (Release 2013\_04, 20225 entries). Precursor and  
735 fragment mass tolerance were set at 7 ppm and 0.5 Da respectively. Trypsin was set as  
736 enzyme, and up to 2 missed cleavages were allowed. Oxidation (M) was set as variable  
737 modification, and Carbamidomethylation (C) as fixed modification. Peptides were filtered  
738 with a 5 % FDR (false discovery rate) and rank 1. Proteins were identified with 1 peptide.

739



740 **FIGURE LEGENDS**

741 **Figure 1: TAF11/TAF13 and TBP form ternary complex.** (A) Human TAF11/TAF13  
742 complex, TBP full-length (TBP<sup>fl</sup>) and core (TBP<sup>c</sup>), and a single-chain version of TFIIA  
743 (TFIIA<sup>s-c</sup>) were purified to homogeneity as shown by SDS-PAGE (left). TFIIA subunits  
744  $\alpha$ (AA2–59),  $\beta$ (AA302–376) and  $\gamma$ (AA2–110) (Bleichenbacher et al. 2003) were connected  
745 with linkers L1(-DGKNTANSANTNTV-) and L2(-SRAVDGELFDT-) as indicated (middle,  
746 top). TFIIA<sup>s-c</sup> crystallized during purification (Figure 1–Figure Supplement 1). The 2.4Å X-  
747 ray structure is shown in a cartoon representation with a section of electron density at  
748  $1\sigma$  (middle, bottom). TFIIA<sup>s-c</sup> was assayed by band-shift for activity (right). DNA,  
749 Adenovirus major late promoter (AdMLP) DNA. (B) Probing formation of putative  
750 pentameric TAF11/TAF13/TBPTFIIA/DNA complex by band-shift assay (Kraemer et al.  
751 2001; Robinson et al. 2005). TAF11/TAF13 titration to the TFIIA/TBP/DNA complex results  
752 in DNA release. (C) SEC analysis reveals a stable TAF11/TAF13/TBP ternary complex.  
753 Elution fractions (1-7) were analysed by SDS-PAGE (inset). IN, equimolar mixture of  
754 TAF11/TAF13 and TBP. No interactions were found between TAF11/TAF13/TBP complex  
755 and TFIIA (Figure 1–Figure Supplement 2). (D) TAF11/TAF13 competes with DNA for TBP  
756 binding, evidenced by SEC. Elution fractions (1-6, 11-16) were analysed by SDS-PAGE and  
757 ethidium-bromide stained agarose gel (inset). IN, preformed TAF11/TAF13/TBP complex;  
758 DNA, AdMLP DNA; M, protein molecular weight marker and DNA ladder, respectively. (E)  
759 Immobilized human TAF1 N-terminal domain (TAF1-TAND) (Anandapadamanaban et al.  
760 2013) efficiently depletes TBP from preformed TAF11/TAF13/TBP complex. RS<sup>IN</sup>, amylose  
761 resin with MBP-tagged TAF1-TAND bound; IN, preformed TAF11/TAF13/TBP; M: protein  
762 marker; FT, flow-through fraction; W, wash fraction; E, maltose elution fraction.

763 **Figure 2: TAF11/TAF13/TBP interactions.** (A) Sedimentation velocity analytical  
764 ultracentrifugation (AUC) experiments reveal a major peak consistent with a 1:1:1

765 TAF11/TAF13/TBP ternary complex. The second, smaller peak corresponds to excess  
766 TAF11/TAF13. **(B)** Native mass spectrometry of the TAF11/TAF13/TBP complex confirms  
767 1:1:1 stoichiometry. Collision induced dissociation (CID) results in TBP monomer and  
768 TAF11/TAF13. Experimental masses are provided (inset). Calculated masses: 20659 Da  
769 (TBP); 40691 Da (TAF11/TAF13); 61351 Da (TAF11/TAF13/TBP). Mass spectra of the  
770 TAF11/TAF13/TBP complex and TBP dimer are shown in Figure 2–Figure Supplement 1.  
771 **(C)** Small-angle X-ray scattering (SAXS) data of TAF11/TAF13/TBP and TAF11/TAF13.  
772 Fit of experimental scattering (dots) and scattering calculated from *ab initio* models (solid  
773 lines) is provided in a log plot (left). SAXS envelopes of TAF11/TAF13 (yellow),  
774 TAF11/TAF13/TBP (grey) and an overlay are shown (right). TBP (PDB ID 1CDW) and  
775 TAF11/TAF13 (PDB ID 1BH8) were placed into the overlay. A distinct extension  
776 (panhandle), likely arising from unstructured tail regions in TAF11/TAF13, enabled  
777 alignment of the SAXS envelopes. Kratky plot,  $P(r)$  and Guinier analysis for corresponding  
778 complexes are provided in Figure 2–Figure Supplement 2. **(D)** TAF11/TAF13/TBP and  
779 TAF11/TAF13 were analysed by hydrogen-deuterium exchange/mass spectrometry (HDX-  
780 MS) (Rajabi et al. 2015). Changes in the deuteration level of selected peptides in TAF11,  
781 TAF13 or TBP are depicted in diagrams (top row). Peptides protected upon ternary complex  
782 formation are coloured in red in cartoon representations of TAF11/TAF13 and TBP (bottom  
783 row). One peptide in TBP (grey, far right) becomes more accessible, hinting at disassembly  
784 of a TBP dimer when TAF11/TAF13 binds (Figure 2–Figure Supplement 1). All peptides  
785 implicated in TAF11/TAF13 binding map to the concave DNA-binding surface of TBP. *(N)*  
786 and *(C)* indicate N- and C-terminal TBP stirrups, respectively.

787 **Figure 3: Architecture of TAF11/TAF13/TBP complex.** TAF11/TAF13/TBP complex  
788 architecture was determined by using an integrative multi-parameter approach, We utilized  
789 the crystal structure of TBP (Nikolov et al. 1996) as well as the crystal structure of the

790 TAF11/TAF13 dimer (Birck et al. 1998) combined with our native MS, SAXS, AUC and  
791 HDX-MS results as well as distance constraints from CLMS experiments (Figure 3–Figure  
792 Supplement 1, Figure 3–Figure Supplement 2). The structure of the TAF11/TAF13/TBP  
793 ternary complex is shown in a cartoon representation in stereo (top) and as a space filling  
794 model (devoid of unstructured regions) in three views (bottom). Three axes (x, y, z, drawn as  
795 arrows) illustrate the special relation between the views. TAF11 is colored in blue, TAF13 in  
796 magenta and TBP in green. This model satisfies >90 % of the experimental constrains (Figure  
797 3–Figure Supplement 3, Tables 3 and 4).

798 **Figure 4: Highly conserved C-terminal TBP-interaction domain (CTID) in TAF13**  
799 **required for survival** (A) Sequence alignments reveal a highly conserved C-terminal TBP  
800 interaction domain (CTID) in TAF13 comprising virtually identical signature residues in  
801 TAF13 from yeast to man. Residues that were mutated in the CTID of TAF13 are indicated  
802 by arrows, giving rise to two mutant TAF13 proteins (Mutant A, B). The locations of the  
803 mutated residues in TAF11/TAF13/TBP are illustrated in Figure 4 - Figure Supplement 1A.  
804 (B) SEC analysis demonstrates complete abolition of the TBP binding by TAF11/TAF13 in  
805 case of Mutant A. In case of Mutant B, residual interaction with TBP is observed (marked by  
806 asterisk). Elution fractions (1-8) were analysed by SDS-PAGE (inset). IN, equimolar mixture  
807 of TAF11/TAF13 and TBP. (C) Cell growth experiments in yeast containing temperature  
808 sensitive (ts) Taf13 on solid media plates at permissive (30°C) and non-permissive (37°C)  
809 temperatures are shown on the left. EV, empty vector; WT, wild-type Taf13; MutA, MutB,  
810 Taf13 mutants A and B; TSA797, TSA636, yeast strains harboring distinct temperature  
811 sensitive Taf13 mutants (Shen et al. 2003; Lemaire et al. 2000). Corresponding absorbance  
812 plots displaying growth curves of temperature sensitive strains in liquid media at the non-  
813 permissive temperature (37°C) are provided on the right. Polynomial fits are shown as dotted  
814 lines. Standard errors of mean (SEM) are shown as bars. The corresponding growth curves

815 for strain BY4741 used as a control, are shown in Figure 4–Figure Supplement 1B. **(D)** Cell  
816 growth experiments in yeast containing Taf13 fused to an auxin-inducible degron tag (AID)  
817 is shown in spot assays on solid media plates (YPD, -LEU) on the left, in presence or absence  
818 of indole-3-acetic acid (IAA) which activates Taf13-AID depletion. 13-AID, Taf13 degron-  
819 tag fusion (Warfield et al. 2017); YPD, yeast total media; -LEU, synthetic drop-out media.  
820 Corresponding absorbance plots displaying growth curves in presence or absence of IAA are  
821 shown on the right.

822 **Figure 5: TAF/TFIID co-immunoprecipitations.** Orbitrap mass spectroscopic analyses of  
823 proteins co-immunoprecipitated from nuclear (NE) or cytoplasmic HeLa cell extracts using  
824 mouse monoclonal antibodies against the indicated TAFs. The stoichiometry of the TAFs and  
825 TBP in the purified TFIID complexes was calculated by determining normalized spectral  
826 abundance factors (NSAFs) (Sardiu et al. 2008; Zybaylov et al. 2007). Each column is the  
827 average of three independent MS runs. Blue arrows indicate the bait in each  
828 immunoprecipitation.

829 **Figure 6: Distinct modes of TBP binding involving the concave DNA-binding surface.**  
830 The interaction interfaces of TBP binders are shown in a cartoon representation (top).  
831 Interactors shown are TATA-box DNA and protein interactors including the TAF11/TAF13  
832 dimer. The binding modes are further illustrated using space-filling models depicting the  
833 corresponding electrostatic surface potentials (bottom). The interacting region representing  
834 the concave DNA-binding surface of TBP is delimited by dashed lines. Structures shown are  
835 TBP on one hand, as well as TATA-DNA (PDB ID 1CDW), a second copy of TBP from the  
836 crystal structure of unliganded TBP (PDB ID 1TBP), TAF1-TAND (PDB ID 1TBA), Mot1  
837 (PDB ID 3OC3) and TAF11/TAF13, respectively, on the other. (N) and (C) indicate N- and  
838 C-terminal TBP. The “TATA-box mimicry” by TAF1-TAND in shape and charge

839 distribution is evident. TAF11/TAF13 engage the entire concave DNA binding surface of  
840 TBP including the stir-ups.

841 **Figure 7: Novel TFIID regulatory state comprising TAF11/TAF13/TBP.** TFIID is  
842 thought to exist in an inhibited ‘canonical’ state with TAF1-TAND bound to TBP’s DNA  
843 binding surface (bottom left). Activated states of TFIID (right) bind promoter DNA stabilized  
844 by TFIIA (Cianfrocco et al. 2013; Louder et al. 2016; Papai et al. 2010). Our results suggest a  
845 novel, alternative TFIID inhibited state comprising TAF11/TAF13/TBP (top left). TFIID is  
846 shown in a cartoon representation based on previous EM studies (Cianfrocco et al. 2013;  
847 Louder et al. 2016; Papai et al. 2010). TFIID lobes A, B and C are indicated. TAF11/TAF13  
848 are placed in lobe A as suggested by immune-labeling analysis (Leurent et al. 2002).  
849 Promoter DNA is colored in grey.

850 **Figure 1–Figure Supplement 1: Crystal structure of TFIIA<sup>s-c</sup> at 2.4 Å resolution.**

851 (A) Superimposition of human TFIIA from a TFIIA/TBP/DNA ternary complex (green, PDB  
852 ID: 1NVP) and uncomplexed TFIIA<sup>s-c</sup> in our crystal (blue) is shown in a cartoon  
853 representation in a stereo view. The structures are virtually identical (rms deviation 0.753 Å).  
854 C, N are C- and N-terminal end of single-chain; L1, L2 are Linker regions. (B) Crystal  
855 packing of TFIIA<sup>s-c</sup>, highlighting the critical role of engineered linkers (yellow spheres) in  
856 mediating the majority of crystal contacts. The unit cell is indicated (grey lines). (C) A close  
857 up highlights the interactions mediated by the linker region between symmetry related  
858 molecules in the crystal lattice. Symmetry related molecules are colored in grey or green,  
859 respectively. Hydrogen bonds (distance cut-off 3.7Å) are shown as black dashed lines.  
860 Amino acid residue numbers are indicated. A section of the 2Fo-Fc electron density map  
861 contoured at 1σ is shown (grey mesh). Crystal statistics are provided in Table 1.

862 **Figure 1–Figure Supplement 2: Size exclusion chromatography (SEC) analysis of**  
863 **TAF11/TAF13/TBP and TFIIA<sup>S-C</sup>.**

864 Interaction analysis of TAF11/TAF13/TBP complex with TFIIA<sup>S-C</sup> by SEC. Performed  
865 TAF11/TAF13/TBP complex and TFIIA<sup>S-C</sup> were combined and injected on a Superdex S200  
866 10/300 column (left). Peak elution fractions were further analyzed by SDS-PAGE (right).  
867 TAF11/TAF13/TBP complex and TFIIA<sup>S-C</sup> eluted in separate peaks indicating a lack of  
868 interaction at the conditions studied. IN, Input sample; M, BioRad prestained marker (MW of  
869 marker bands are indicated). Elution fractions are numbered 1 to 11.

870 **Figure 2–Figure Supplement 1: Native mass spectrometry (MS) analysis of**  
871 **TAF11/TAF13/TBP complex.**

872 Mass spectrum of the TAF11/TAF13/TBP complex recorded from a buffer solution  
873 containing 150 mM ammonium acetate (pH7.5). Two charge state series are observed  
874 corresponding to complex with (circles filled in purple) and without (circles filled in orange)  
875 an oligo-histidine affinity purification tag, respectively. Calculated masses: 20659 Da  
876 (TBP); 22765 Da (TBP with His-tag); 45531 Da (TBP dimer); 40691 Da (TAF11/TAF13).  
877 The inset shows the native MS spectrum recorded for separately purified TBP alone,  
878 evidencing a TBP dimer.

879 **Figure 2–Figure Supplement 2: Small Angle X-ray Scattering (SAXS) of TAF11/TAF13**  
880 **and TAF11/TAF13/TBP.**

881 Kratky plot, P(r) and Guinier analysis of the SAXS data of TAF11/TAF13/TBP and  
882 TAF11/TAF13, respectively are shown. (A) Kratky plots for TAF11/TAF13/TBP (light gray)  
883 and TAF11/TAF13 (light orange) indicate globular and flexible domains. (B) Guinier plots  
884 for TAF11/TAF13/TBP (left) and TAF11/TAF13 (right) are shown; R<sub>g</sub> values are indicated.

885 Residuals of the linear fit are represented as green lines. (C) Distance distribution analysis for  
886 TAF11/TAF13/TBP (left) and TAF11/TAF13 (right). SAXS statistics are provided in Table  
887 2.

888 **Figure 3–Figure Supplement 1: Cross-linking/mass spectrometry (CLMS).**

889 TAF11/TAF13/TBP complex and TAF11/TAF13 complex were cross-linked separately using  
890 bissulfosuccinimidyl suberate (BS3) and then further purified by SEC using a Superdex 200  
891 10/300 column. Cross-linked and purified TAF11/TAF13/TBP complex (lane 1) and  
892 TAF11/TAF13/TBP complex (lane 2) were analyzed by SDS-PAGE (left). The top band  
893 corresponds to cross-linked TAF11/TAF13/TBP, the middle band to TAF11/TAF13; the  
894 band on the bottom to uncross-linked TAF11. Cross-linked TAF11/TAF13 is present also in  
895 the cross-linked TAF11/TAF13/TBP sample. Bands were excised, reduced, alkylated, trypsin  
896 digested and desalted followed by mass spectrometric analysis. Cross-links were identified  
897 between TAF11 and TAF13, TAF11 and TBP as well as TAF13 and TBP. Cross-links  
898 between TAF11-TAF13, TAF11-TBP and TAF13-TBP are shown using 5% FDR cutoff data  
899 (right). The N-terminal region of TAF11 is lacking amino acids R and K, and consequently,  
900 no cross-links were observed with BS3. Observed cross-links are listed in Table 4.

901 **Figure 3–Figure Supplement 2: Site-specific cross-linking of TAF11 and TAF13 by**  
902 **Genetic Code Expansion (GCE)**

903 The UV-activatable amino acid DiAzKs (Diazirine-Lysine) was introduced at position K34 in  
904 TAF13 by genetic code expansion (MultiBacTAG) (Koehler et al. 2016). Thus labelled  
905 TAF11/TAF13 complex and TBP were reconstituted into TAF11/TAF13/TBP complex,  
906 which was then exposed to UV light. A cartoon representation of TAF/TAF13/TBP is shown  
907 (left) with a zoom-in on the site of ncAA introduction (right). K34 of TAF13 was chosen as it  
908 appears to be located at/near the interfaces between TAF13, TAF11 and TBP in our model of

909 the ternary complex. Cross-linked sample then was separated by SDS-PAGE, excised from  
910 gel, reduced, alkylated, trypsin digested and desalted followed by mass spectrometry  
911 analysis. Specific cross-linking patterns were obtained upon TAF11/TAF13 complex  
912 formation with TBP. Example of mass spectrum for a cross-linked peptide is shown below.

913 **Figure 3–Figure Supplement 3: Mapping CLMS and HDX-MS data on**  
914 **TAF11/TAF13/TBP complex.**

915 (A) Cross-links identified by BS3 CLMS mapped on the TAF11/TAF13/TBP ternary  
916 complex. The current model satisfies >90 % of all observed cross-links. Cross-linking sites  
917 are depicted as red balls. (B) Regions on TBP exhibiting changes in deuteration levels upon  
918 complex formation with TAF11/TAF13 are highlighted in red.

919 **Figure 4 – Figure Supplement 1: TAF11 CTID mutant studies (A)** Location of amino acid  
920 residues mutated in TAF11 Mutant A and Mutant B, respectively, mapped on the  
921 TAF11/TAF13/TBP architecture. Mutated amino acids are drawn in van-der-Waals  
922 representation. TAF11 and TAF13 are shown as ribbons colored in blue and magenta,  
923 respectively. TBP is shown in surface representation colored in green. Amino acids mutated  
924 in Mutant A are at the center of the TAF11/TAF13 interaction surface with TBP, while amino  
925 acids mutated in Mutant B are more in the periphery of the interaction. (B) Growth curves for  
926 the wild-type strain, BY4741, are shown. BY4741 was transformed with empty vector (EV),  
927 vector containing the gene for wild-type TAF13 (WT) and the two mutants (A, B),  
928 respectively, and grown at 37°C. Polynomial fits for each growth curve are shown as dotted  
929 lines. Standard errors of mean (SEM) calculated from three independent experiments are  
930 shown as bars.

931 **Figure 6–Figure Supplement 1: TAF1-TAND TATA-box mimicry in *Drosophila* and**  
932 **Yeast**



933 Cartoon representation (top row) and electrostatic surface potential (bottom row) of TBP  
934 (left, PDB ID: 1TBP), TATA-DNA (PDB ID: 1CDW), and TAF1-TAND from *Drosophila*  
935 (PDB ID: 1TBA) and Yeast (PDB ID: 4B0A). The DNA binding surface of TBP is shown  
936 (left), as well as the corresponding complementary surfaces of the interactors (right). Red  
937 indicates regions with negative charge, blue indicates regions with positive charge. The shape  
938 and surface charge similarity between *Drosophila* TAF1-TAND and TATA-DNA is evident  
939 ('TATA-box mimicry'), but is less pronounced in TAF1-TAND from yeast. Yeast TAF1-  
940 TAND binding is more extensive involving also the convex surface of TBP (Table 5).  
941

942 **REFERENCES**

- 943 Albright SR, Tjian R (2000) TAFs revisited: more data reveal new twists and confirm old  
944 ideas. *Gene* 242: 1-13.
- 945 Anandapadamanaban M, Andresen C, Helander S, Ohyama Y, Siponen MI, Lundstrom P,  
946 Kokubo T, Ikura M, Moche M, Sunnerhagen M (2013) High-resolution structure of TBP  
947 with TAF1 reveals anchoring patterns in transcriptional regulation. *Nat Struct Mol Biol*  
948 20: 1008-14. doi: 10.1038/nsmb.2611
- 949 Auble DT, Hahn S (1993) An ATP-dependent inhibitor of TBP binding to DNA. *Genes Dev*  
950 7: 844-56.
- 951 Berger I, Fitzgerald DJ, Richmond TJ (2004) Baculovirus expression system for heterologous  
952 multiprotein complexes. *Nat Biotechnol* 22: 1583-7. doi: 10.1038/nbt1036
- 953 Bieniossek C, Papai G, Schaffitzel C, Garzoni F, Chaillet M, Scheer E, Papadopoulos P, Tora  
954 L, Schultz P, Berger I (2013) The architecture of human general transcription factor TFIID  
955 core complex. *Nature* 493: 699-702. doi: 10.1038/nature11791
- 956 Birk C, Poch O, Romier C, Ruff M, Mengus G, Lavigne AC, Davidson I, Moras D (1998)  
957 Human TAF(II)28 and TAF(II)18 interact through a histone fold encoded by atypical  
958 evolutionary conserved motifs also found in the SPT3 family. *Cell* 94: 239-249. doi: Doi  
959 10.1016/S0092-8674(00)81423-3
- 960 Bleichenbacher M, Tan S, Richmond TJ (2003) Novel interactions between the components  
961 of human and yeast TFIIA/TBP/DNA complexes. *Journal of Molecular Biology* 332: 783-  
962 793. doi: Doi 10.1016/S0022-2836(03)00887-8
- 963 Burley SK, Roeder RG (1998) TATA box mimicry by TFIID: autoinhibition of pol II  
964 transcription. *Cell* 94: 551-3.
- 965 Chen ZA, Jawhari A, Fischer L, Buchen C, Tahir S, Kamenski T, Rasmussen M, Lariviere L,  
966 Bukowski-Wills JC, Nilges M, Cramer P, Rappsilber J (2010) Architecture of the RNA  
967 polymerase II-TFIIF complex revealed by cross-linking and mass spectrometry. *EMBO J*  
968 29: 717-26. doi: 10.1038/emboj.2009.401
- 969 Cianfrocco MA, Kassavetis GA, Grob P, Fang J, Juven-Gershon T, Kadonaga JT, Nogales E  
970 (2013) Human TFIID binds to core promoter DNA in a reorganized structural state. *Cell*  
971 152: 120-31. doi: 10.1016/j.cell.2012.12.005
- 972 Cox J, Mann M (2008) MaxQuant enables high peptide identification rates, individualized  
973 p.p.b.-range mass accuracies and proteome-wide protein quantification. *Nat Biotechnol*  
974 26: 1367-72. doi: 10.1038/nbt.1511
- 975 de Vries SJ, van Dijk M, Bonvin AM (2010) The HADDOCK web server for data-driven  
976 biomolecular docking. *Nat Protoc* 5: 883-97. doi: 10.1038/nprot.2010.32
- 977 Dignam JD, Lebovitz RM, Roeder RG (1983) Accurate transcription initiation by RNA  
978 polymerase II in a soluble extract from isolated mammalian nuclei. *Nucleic Acids Res* 11:  
979 1475-89.

- 980 Fitzgerald DJ, Berger P, Schaffitzel C, Yamada K, Richmond TJ, Berger I (2006) Protein  
981 complex expression by using multigene baculoviral vectors. *Nat Methods* 3: 1021-1032.  
982 doi: Doi 10.1038/Nmeth983
- 983 Gangloff YG, Romier C, Thuault S, Werten S, Davidson I (2001a) The histone fold is a key  
984 structural motif of transcription factor TFIID. *Trends Biochem Sci* 26: 250-7.
- 985 Gangloff YG, Sanders SL, Romier C, Kirschner D, Weil PA, Tora L, Davidson I (2001b)  
986 Histone folds mediate selective heterodimerization of yeast TAF(II)25 with TFIID  
987 components yTAF(II)47 and yTAF(II)65 and with SAGA component ySPT7. *Mol Cell*  
988 *Biol* 21: 1841-53. doi: 10.1128/MCB.21.5.1841-1853.2001
- 989 Gegonne A, Tai X, Zhang J, Wu G, Zhu J, Yoshimoto A, Hanson J, Cultraro C, Chen QR,  
990 Guinter T, Yang Z, Hathcock K, Singer A, Rodriguez-Canales J, Tessarollo L, Mackem S,  
991 Meerzaman D, Buetow K, Singer DS (2012) The general transcription factor TAF7 is  
992 essential for embryonic development but not essential for the survival or differentiation of  
993 mature T cells. *Mol Cell Biol* 32: 1984-97. doi: 10.1128/MCB.06305-11
- 994 Giladi M, Almagor L, van Dijk L, Hiller R, Man P, Forest E, Khananshvoli D (2016)  
995 Asymmetric Preorganization of Inverted Pair Residues in the Sodium-Calcium Exchanger.  
996 *Sci Rep* 6: 20753. doi: 10.1038/srep20753
- 997 Goodrich JA, Tjian R (2010) Unexpected roles for core promoter recognition factors in cell-  
998 type-specific transcription and gene regulation. *Nat Rev Genet* 11: 549-58. doi:  
999 10.1038/nrg2847
- 1000 Gupta K, Sari-Ak D, Haffke M, Trowitzsch S, Berger I (2016) Zooming in on Transcription  
1001 Preinitiation. *J Mol Biol* 428: 2581-91. doi: 10.1016/j.jmb.2016.04.003
- 1002 Haffke M, Viola C, Nie Y, Berger I (2013) Tandem recombineering by SLIC cloning and  
1003 Cre-LoxP fusion to generate multigene expression constructs for protein complex  
1004 research. *Methods Mol Biol* 1073:131-40. doi: 10.1007/978-1-62703-625-2\_11.
- 1005 Hampsey M, Reinberg D (1999) RNA polymerase II as a control panel for multiple  
1006 coactivator complexes. *Curr Opin Genet Dev* 9: 132-9. doi: 10.1016/S0959-  
1007 437X(99)80020-3
- 1008 Hernandez H, Robinson CV (2007) Determining the stoichiometry and interactions of  
1009 macromolecular assemblies from mass spectrometry. *Nat Protoc* 2: 715-26. doi:  
1010 10.1038/nprot.2007.73
- 1011 Hoiby T, Zhou H, Mitsiou DJ, Stunnenberg HG (2007) A facelift for the general transcription  
1012 factor TFIIA. *Biochim Biophys Acta* 1769: 429-36. doi: 10.1016/j.bbexp.2007.04.008
- 1013 Hsu JY, Juven-Gershon T, Marr MT, 2nd, Wright KJ, Tjian R, Kadonaga JT (2008) TBP,  
1014 Mot1, and NC2 establish a regulatory circuit that controls DPE-dependent versus TATA-  
1015 dependent transcription. *Genes Dev* 22: 2353-8. doi: 10.1101/gad.1681808
- 1016 Incardona MF, Bourenkov GP, Levik K, Pieritz RA, Popov AN, Svensson O (2009) EDNA:  
1017 a framework for plugin-based applications applied to X-ray experiment online data  
1018 analysis. *J Synchrotron Radiat* 16: 872-9. doi: 10.1107/S0909049509036681

- 1019 Ishihama Y, Rappsilber J, Andersen JS, Mann M (2002) Microcolumns with self-assembled  
1020 particle frits for proteomics. *J Chromatogr A* 979: 233-9.
- 1021 Kabsch W (2010) Xds. *Acta Crystallogr D Biol Crystallogr* 66: 125-32. doi:  
1022 10.1107/S0907444909047337
- 1023 Kamada K, Shu F, Chen H, Malik S, Stelzer G, Roeder RG, Meisterernst M, Burley SK  
1024 (2001) Crystal structure of negative cofactor 2 recognizing the TBP-DNA transcription  
1025 complex. *Cell* 106: 71-81.
- 1026 Kim JL, Nikolov DB, Burley SK (1993) Co-crystal structure of TBP recognizing the minor  
1027 groove of a TATA element. *Nature* 365: 520-7. doi: 10.1038/365520a0
- 1028 Kim TH, Barrera LO, Zheng M, Qu C, Singer MA, Richmond TA, Wu Y, Green RD, Ren B  
1029 (2005) A high-resolution map of active promoters in the human genome. *Nature* 436: 876-  
1030 80. doi: 10.1038/nature03877
- 1031 Koehler C, Sauter PF, Wawryszyn M, Girona GE, Gupta K, Landry JJ, Fritz MH, Radic K,  
1032 Hoffmann JE, Chen ZA, Zou J, Tan PS, Galik B, Junttila S, Stolt-Bergner P, Pruneri G,  
1033 Gyenesei A, Schultz C, Biskup MB, Besir H, Benes V, Rappsilber J, Jechlinger M, Korbel  
1034 JO, Berger I, Braese S, Lemke EA (2016) Genetic code expansion for multiprotein  
1035 complex engineering. *Nat Methods*. doi: 10.1038/nmeth.4032
- 1036 Koster MJ, Snel B, Timmers HT (2015) Genesis of chromatin and transcription dynamics in  
1037 the origin of species. *Cell* 161: 724-36. doi: 10.1016/j.cell.2015.04.033
- 1038 Kraemer SM, Ranallo RT, Ogg RC, Stargell LA (2001) TFIIA interacts with TFIID via  
1039 association with TATA-binding protein and TAF40. *Mol Cell Biol* 21: 1737-46. doi:  
1040 10.1128/MCB.21.5.1737-1746.2001
- 1041 Lavigne AC, Gangloff YG, Carre L, Mengus G, Birck C, Poch O, Romier C, Moras D,  
1042 Davidson I (1999) Synergistic transcriptional activation by TATA-binding protein and  
1043 hTAFII28 requires specific amino acids of the hTAFII28 histone fold. *Mol Cell Biol* 19:  
1044 5050-60.
- 1045 Lemaire M, Collart MA (2000) The TATA-binding protein-associated factor yTafII19p  
1046 functionally interacts with components of the global transcriptional regulator Ccr4-Not  
1047 complex and physically interacts with the Not5 subunit. *J Biol Chem* 275(35):26925-34.  
1048 doi: 10.1074/jbc.M002701200
- 1049 Leurent C, Sanders S, Ruhlmann C, Mallouh V, Weil PA, Kirschner DB, Tora L, Schultz P  
1050 (2002) Mapping histone fold TAFs within yeast TFIID. *EMBO J* 21: 3424-33. doi:  
1051 10.1093/emboj/cdf342
- 1052 Li MZ, Elledge SJ (2007) Harnessing homologous recombination in vitro to generate  
1053 recombinant DNA via SLIC. *Nat Methods* 4: 251-6. doi: 10.1038/nmeth1010
- 1054 Liu D, Ishima R, Tong KI, Bagby S, Kokubo T, Muhandiram DR, Kay LE, Nakatani Y, Ikura  
1055 M (1998) Solution structure of a TBP-TAF(II)230 complex: protein mimicry of the minor  
1056 groove surface of the TATA box unwound by TBP. *Cell* 94: 573-83.

- 1057 Louder RK, He Y, Lopez-Blanco JR, Fang J, Chacon P, Nogales E (2016) Structure of  
1058 promoter-bound TFIID and model of human pre-initiation complex assembly. *Nature* 531:  
1059 604-9. doi: 10.1038/nature17394
- 1060 Maiolica A, Cittaro D, Borsotti D, Sennels L, Ciferri C, Tarricone C, Musacchio A,  
1061 Rappsilber J (2007) Structural analysis of multiprotein complexes by cross-linking, mass  
1062 spectrometry, and database searching. *Mol Cell Proteomics* 6: 2200-11. doi:  
1063 10.1074/mcp.M700274-MCP200
- 1064 Mal TK, Masutomi Y, Zheng L, Nakata Y, Ohta H, Nakatani Y, Kokubo T, Ikura M (2004)  
1065 Structural and functional characterization on the interaction of yeast TFIID subunit TAF1  
1066 with TATA-binding protein. *Journal of Molecular Biology* 339: 681-93. doi:  
1067 10.1016/j.jmb.2004.04.020
- 1068 Maston GA, Zhu LJ, Chamberlain L, Lin L, Fang M, Green MR (2012) Non-canonical TAF  
1069 complexes regulate active promoters in human embryonic stem cells. *Elife* 1: e00068. doi:  
1070 10.7554/eLife.00068
- 1071 Matangkasombut O, Auty R, Buratowski S (2004) Structure and function of the TFIID  
1072 complex. *Adv Protein Chem* 67: 67-92. doi: 10.1016/S0065-3233(04)67003-3
- 1073 McCoy AJ (2007) Solving structures of protein complexes by molecular replacement with  
1074 Phaser. *Acta Crystallogr D Biol Crystallogr* 63: 32-41. doi: 10.1107/S0907444906045975
- 1075 Mohan WS, Jr., Scheer E, Wendling O, Metzger D, Tora L (2003) TAF10 (TAF(II)30) is  
1076 necessary for TFIID stability and early embryogenesis in mice. *Mol Cell Biol* 23: 4307-18.
- 1077 Muller F, Tora L (2014) Chromatin and DNA sequences in defining promoters for  
1078 transcription initiation. *Biochim Biophys Acta* 1839: 118-28. doi:  
1079 10.1016/j.bbagr.2013.11.003
- 1080 Muller F, Zaucker A, Tora L (2010) Developmental regulation of transcription initiation:  
1081 more than just changing the actors. *Curr Opin Genet Dev* 20: 533-40. doi:  
1082 10.1016/j.gde.2010.06.004
- 1083 Nikolov DB, Chen H, Halay ED, Hoffman A, Roeder RG, Burley SK (1996) Crystal  
1084 structure of a human TATA box-binding protein/TATA element complex. *Proc Natl Acad*  
1085 *Sci U S A* 93: 4862-7.
- 1086 Nikolov DB, Hu SH, Lin J, Gasch A, Hoffmann A, Horikoshi M, Chua NH, Roeder RG,  
1087 Burley SK (1992) Crystal structure of TFIID TATA-box binding protein. *Nature* 360: 40-  
1088 6. doi: 10.1038/360040a0
- 1089 Papai G, Tripathi MK, Ruhlmann C, Layer JH, Weil PA, Schultz P (2010) TFIIA and the  
1090 transactivator Rap1 cooperate to commit TFIID for transcription initiation. *Nature* 465:  
1091 956-60. doi: 10.1038/nature09080
- 1092 Pereira LA, Klejman MP, Timmers HT (2003) Roles for BTAF1 and Mot1p in dynamics of  
1093 TATA-binding protein and regulation of RNA polymerase II transcription. *Gene* 315: 1-  
1094 13.

- 1095 Pernot P, Round A, Barrett R, De Maria Antolinos A, Gobbo A, Gordon E, Huet J, Kieffer J,  
1096 Lentini M, Mattenet M, Morawe C, Mueller-Dieckmann C, Ohlsson S, Schmid W, Surr J,  
1097 Theveneau P, Zerrad L, McSweeney S (2013) Upgraded ESRF BM29 beamline for SAXS  
1098 on macromolecules in solution. *J Synchrotron Radiat* 20: 660-4. doi:  
1099 10.1107/S0909049513010431
- 1100 Petoukhov MV, Franke D, Shkumatov AV, Tria G, Kikhney AG, Gajda M, Gorba C,  
1101 Mertens HD, Konarev PV, Svergun DI (2012) New developments in the program package  
1102 for small-angle scattering data analysis. *J Appl Crystallogr* 45: 342-350. doi:  
1103 10.1107/S0021889812007662
- 1104 Rajabi K, Ashcroft AE, Radford SE (2015) Mass spectrometric methods to analyze the  
1105 structural organization of macromolecular complexes. *Methods* 89: 13-21. doi:  
1106 10.1016/j.ymeth.2015.03.004
- 1107 Rappsilber J, Mann M, Ishihama Y (2007) Protocol for micro-purification, enrichment, pre-  
1108 fractionation and storage of peptides for proteomics using StageTips. *Nat Protoc* 2: 1896-  
1109 906. doi: 10.1038/nprot.2007.261
- 1110 Rhee HS, Pugh BF (2012) Genome-wide structure and organization of eukaryotic pre-  
1111 initiation complexes. *Nature* 483: 295-301. doi: 10.1038/nature10799
- 1112 Robinson MM, Yatherajam G, Ranallo RT, Bric A, Paule MR, Stargell LA (2005) Mapping  
1113 and functional characterization of the TAF11 interaction with TFIIA. *Mol Cell Biol* 25:  
1114 945-57. doi: 10.1128/MCB.25.3.945-957.2005
- 1115 Sardiù ME, Cai Y, Jin J, Swanson SK, Conaway RC, Conaway JW, Florens L, Washburn MP  
1116 (2008) Probabilistic assembly of human protein interaction networks from label-free  
1117 quantitative proteomics. *Proc Natl Acad Sci U S A* 105: 1454-9. doi:  
1118 10.1073/pnas.0706983105
- 1119 Schuck P (2000) Size-distribution analysis of macromolecules by sedimentation velocity  
1120 ultracentrifugation and lamm equation modeling. *Biophys J* 78: 1606-19. doi:  
1121 10.1016/S0006-3495(00)76713-0
- 1122 Shen WC, Bhaumik SR, Causton HC, Simon I, Zhu X, Jennings EG, Wang TH, Young RA,  
1123 Green MR (2003) Systematic analysis of essential yeast TAFs in genome-wide  
1124 transcription and preinitiation complex assembly. *EMBO J* 22(13):3395-402. doi:  
1125 10.1093/emboj/cdg336
- 1126 Thomas MC, Chiang CM (2006) The general transcription machinery and general cofactors.  
1127 *Crit Rev Biochem Mol Biol* 41: 105-78. doi: 10.1080/10409230600648736
- 1128 Tora L, Timmers HT (2010) The TATA box regulates TATA-binding protein (TBP)  
1129 dynamics in vivo. *Trends Biochem Sci* 35: 309-14. doi: 10.1016/j.tibs.2010.01.007
- 1130 Trowitzsch S, Viola C, Scheer E, Conic S, Chavant V, Fournier M, Papai G, Ebong IO,  
1131 Schaffitzel C, Zou J, Haffke M, Rappsilber J, Robinson CV, Schultz P, Tora L, Berger I  
1132 (2015) Cytoplasmic TAF2-TAF8-TAF10 complex provides evidence for nuclear holo-  
1133 TFIID assembly from preformed submodules. *Nat Commun* 6: 6011. doi:  
1134 10.1038/ncomms7011

- 1135 Vermeulen M, Mulder KW, Denissov S, Pijnappel WW, van Schaik FM, Varier RA,  
1136 Baltissen MP, Stunnenberg HG, Mann M, Timmers HT (2007) Selective anchoring of  
1137 TFIID to nucleosomes by trimethylation of histone H3 lysine 4. *Cell* 131: 58-69. doi:  
1138 10.1016/j.cell.2007.08.016
- 1139 Verrijzer CP, Chen JL, Yokomori K, Tjian R (1995) Binding of TAFs to core elements  
1140 directs promoter selectivity by RNA polymerase II. *Cell* 81: 1115-25.
- 1141 Webb B, Sali A (2014) Comparative Protein Structure Modeling Using MODELLER.  
1142 *Current Protocols in Bioinformatics*. John Wiley & Sons, Inc.
- 1143 Werten S, Mitschler A, Romier C, Gangloff YG, Thuault S, Davidson I, Moras D (2002)  
1144 Crystal structure of a subcomplex of human transcription factor TFIID formed by TATA  
1145 binding protein-associated factors hTAF4 (hTAF(II)135) and hTAF12 (hTAF(II)20). *J*  
1146 *Biol Chem* 277: 45502-9. doi: 10.1074/jbc.M206587200
- 1147 Winn MD, Ballard CC, Cowtan KD, Dodson EJ, Emsley P, Evans PR, Keegan RM, Krissinel  
1148 EB, Leslie AG, McCoy A, McNicholas SJ, Murshudov GN, Pannu NS, Potterton EA,  
1149 Powell HR, Read RJ, Vagin A, Wilson KS (2011) Overview of the CCP4 suite and current  
1150 developments. *Acta Crystallogr D Biol Crystallogr* 67: 235-42. doi:  
1151 10.1107/S0907444910045749
- 1152 Warfield L, Ramachandran S, Baptista T, Tora L, Devys D, Hahn S Transcription of nearly  
1153 all yeast RNA Polymerase II-transcribed genes is dependent on transcription factor TFIID  
1154 (submitted 2017).
- 1155 Wollmann P, Cui S, Viswanathan R, Berninghausen O, Wells MN, Moldt M, Witte G,  
1156 Butryn A, Wendler P, Beckmann R, Auble DT, Hopfner KP (2011) Structure and  
1157 mechanism of the Swi2/Snf2 remodeller Mot1 in complex with its substrate TBP. *Nature*  
1158 475: 403-7. doi: 10.1038/nature10215
- 1159 Wright KJ, Marr MT, 2nd, Tjian R (2006) TAF4 nucleates a core subcomplex of TFIID and  
1160 mediates activated transcription from a TATA-less promoter. *Proc Natl Acad Sci U S A*  
1161 103: 12347-52. doi: 10.1073/pnas.0605499103
- 1162 Xie J, Collart M, Lemaire M, Stelzer G, Meisterernst M (2000) A single point mutation in  
1163 TFIIA suppresses NC2 requirement in vivo. *EMBO J* 19: 672-82. doi:  
1164 10.1093/emboj/19.4.672
- 1165 Xie X, Kokubo T, Cohen SL, Mirza UA, Hoffmann A, Chait BT, Roeder RG, Nakatani Y,  
1166 Burley SK (1996) Structural similarity between TAFs and the heterotetrameric core of the  
1167 histone octamer. *Nature* 380: 316-22. doi: 10.1038/380316a0
- 1168 Zybaylov BL, Florens L, Washburn MP (2007) Quantitative shotgun proteomics using a  
1169 protease with broad specificity and normalized spectral abundance factors. *Mol Biosyst* 3:  
1170 354-60. doi: 10.1039/b701483j
- 1171

1172 **Accession codes.** Atomic coordinates and structure factors have been deposited in the Protein  
1173 Data Bank (PDB ID 5M4S). Proteomics data has been submitted to PRIDE (Accession  
1174 number PXD005676)

1175

1176

#### 1177 **ACKNOWLEDGEMENT**

1178 We thank all members of our laboratories for helpful discussions. We are grateful to Max  
1179 Nanao, Aurelien Deniaud, Christian Becke, Moreno Wichert and Timothy J. Richmond for  
1180 valuable contributions. Frederic Garzoni is acknowledged for MultiBac expressions. We  
1181 thank Steven Hahn for kindly providing the Taf13-AID strain and Tony Weil for providing  
1182 yeast TAF constructs and antibody reagents. This work was supported by the Agence  
1183 Nationale de Recherche (ANR, France) DiscoverIID (to LT and IB). CK and EAL are funded  
1184 by the Baden-Wuerttemberg Stiftung (Germany). This work was supported by the Wellcome  
1185 Trust (Senior Research Fellowship to JR: 103139, Centre core grant: 092076, instrument  
1186 grant: 108504). LT is recipient of a European Research Council (ERC) Advanced grant  
1187 (Birtoaction). IB is recipient of a Senior Investigator Award from the Wellcome Trust. This  
1188 research received support from BrisSynBio, a BBSRC/EPSRC Research Centre for synthetic  
1189 biology at the University of Bristol (BB/L01386X/1).

1190

#### 1191 **AUTHOR CONTRIBUTIONS**

1192 IB and LT conceived this research. KG prepared samples and carried out experiments. All  
1193 other authors provided critical analytical tools, expertise or reagents. KG, LT and IB co-wrote  
1194 the manuscript with input from all authors.

1195

#### 1196 **COMPETING FINANCIAL INTEREST STATEMENT**



1197 The authors declare no competing financial interest.

1198 FIGURES

1199 Figure 1

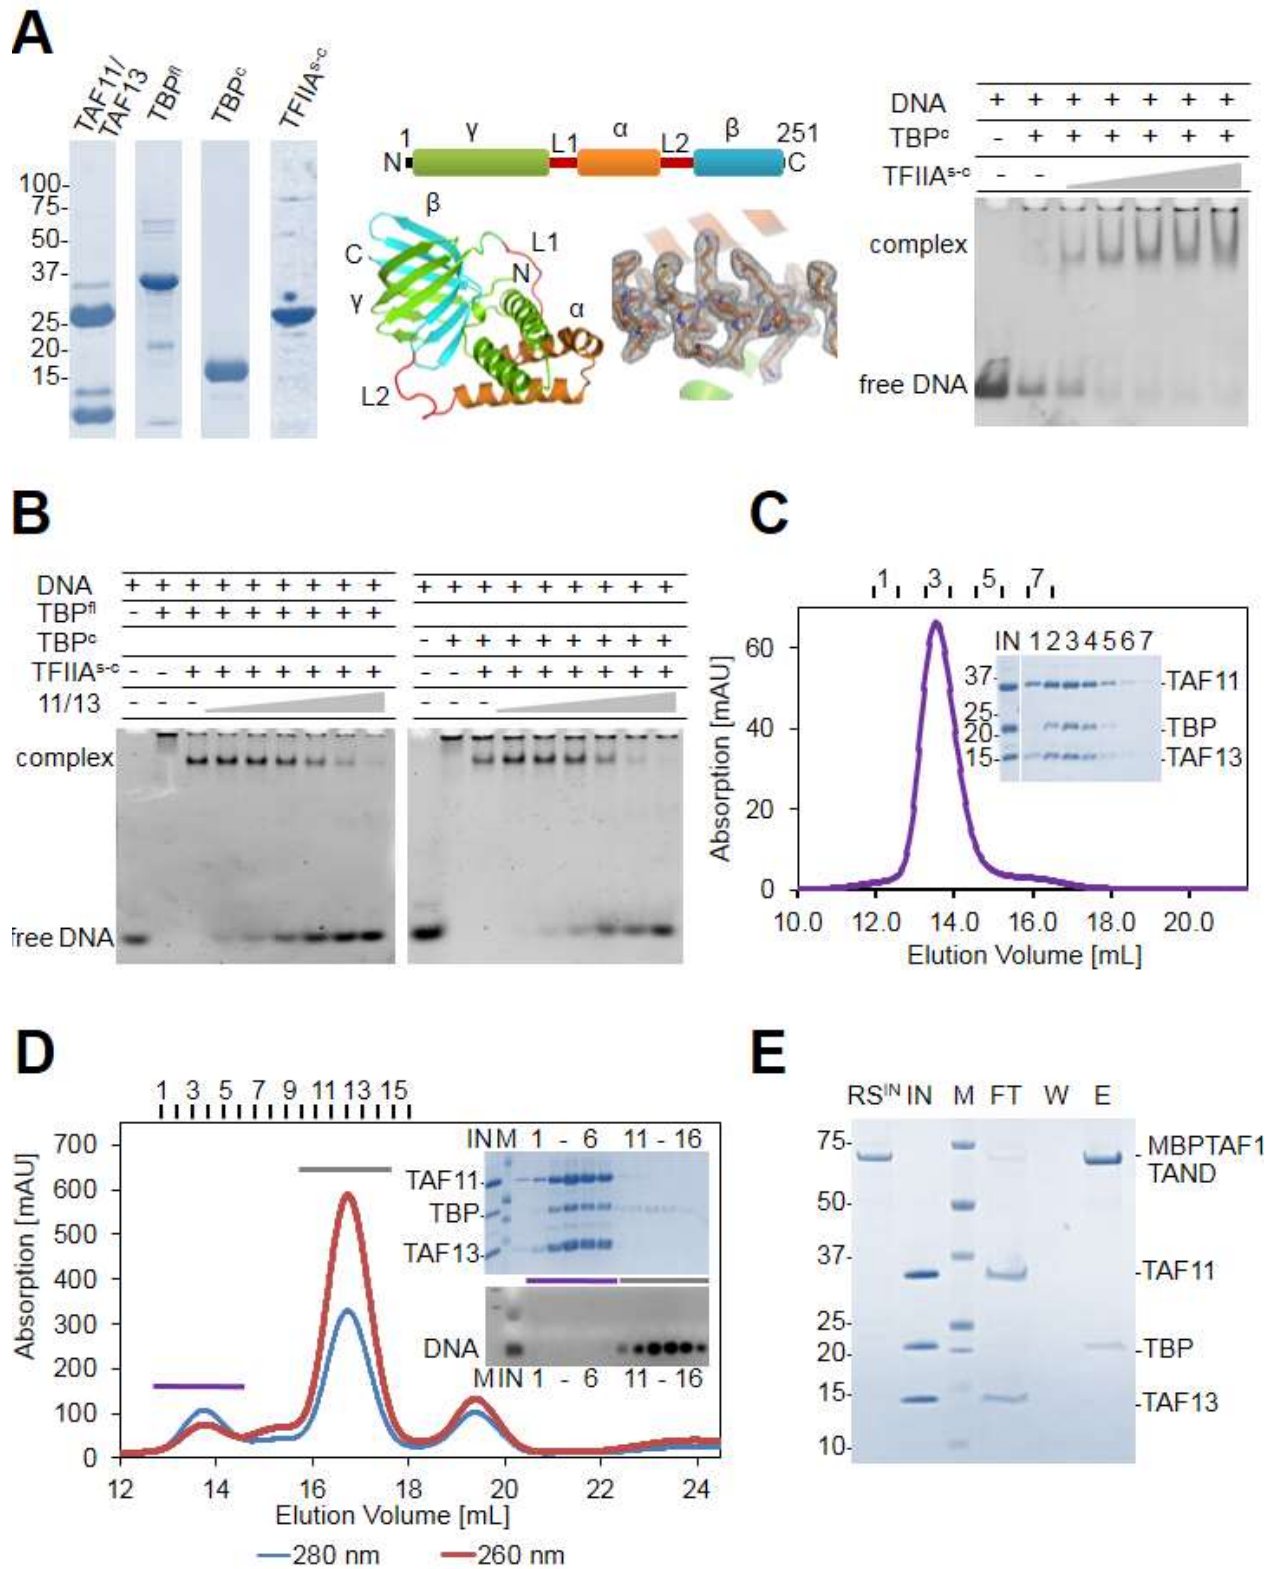

1200  
1201

1202 **Figure 2**

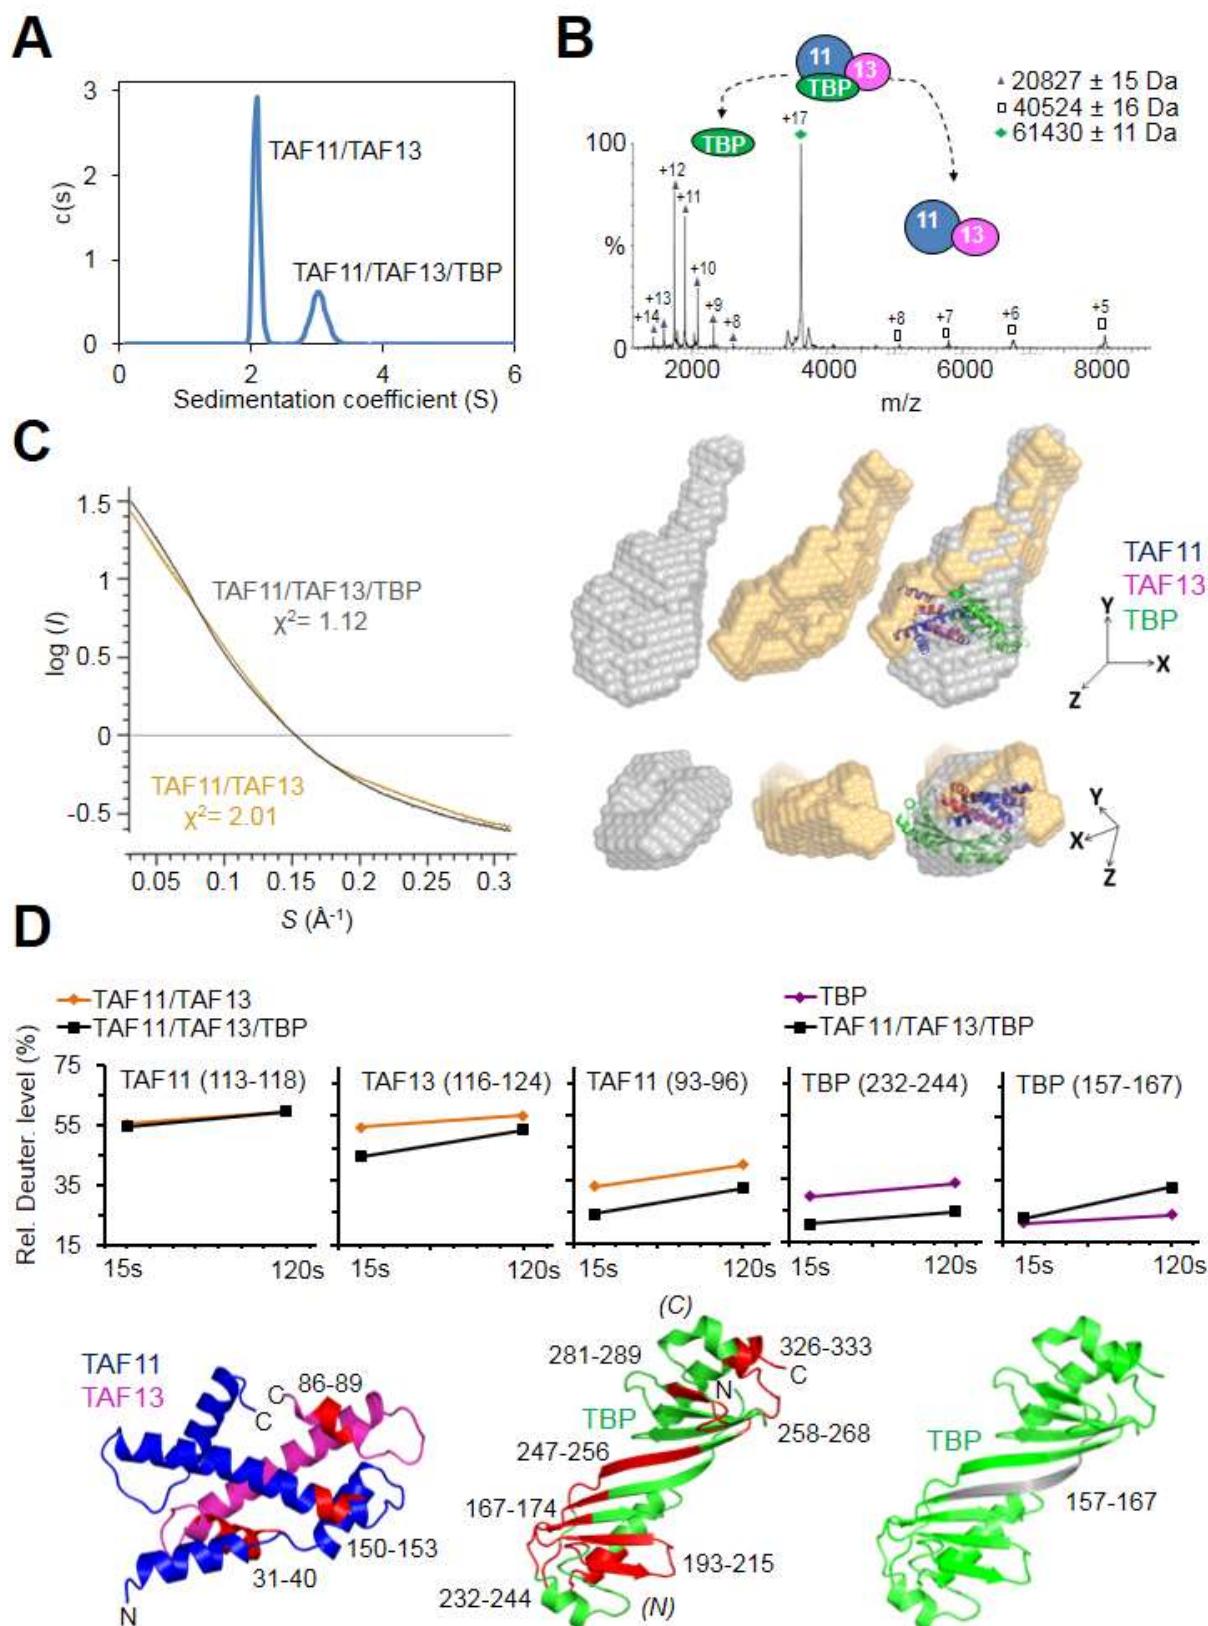

1203  
1204

1205 **Figure 3**

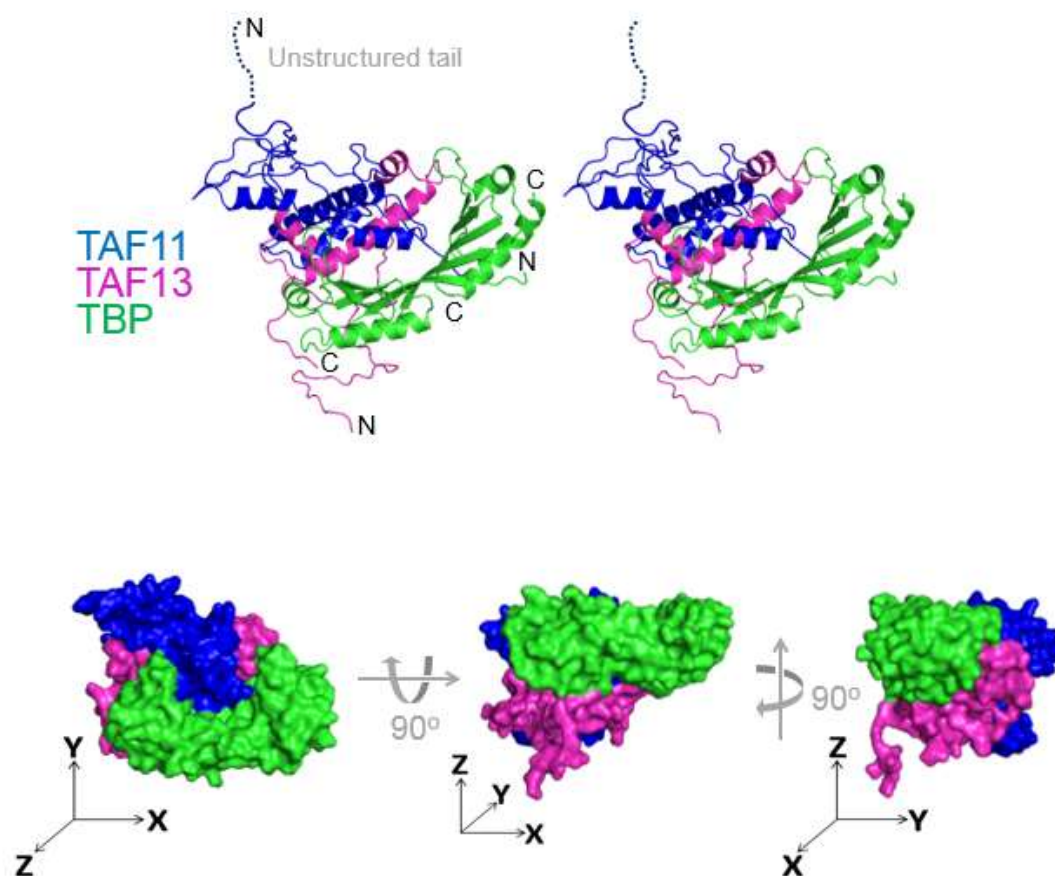

1206

1207 **Figure 4**

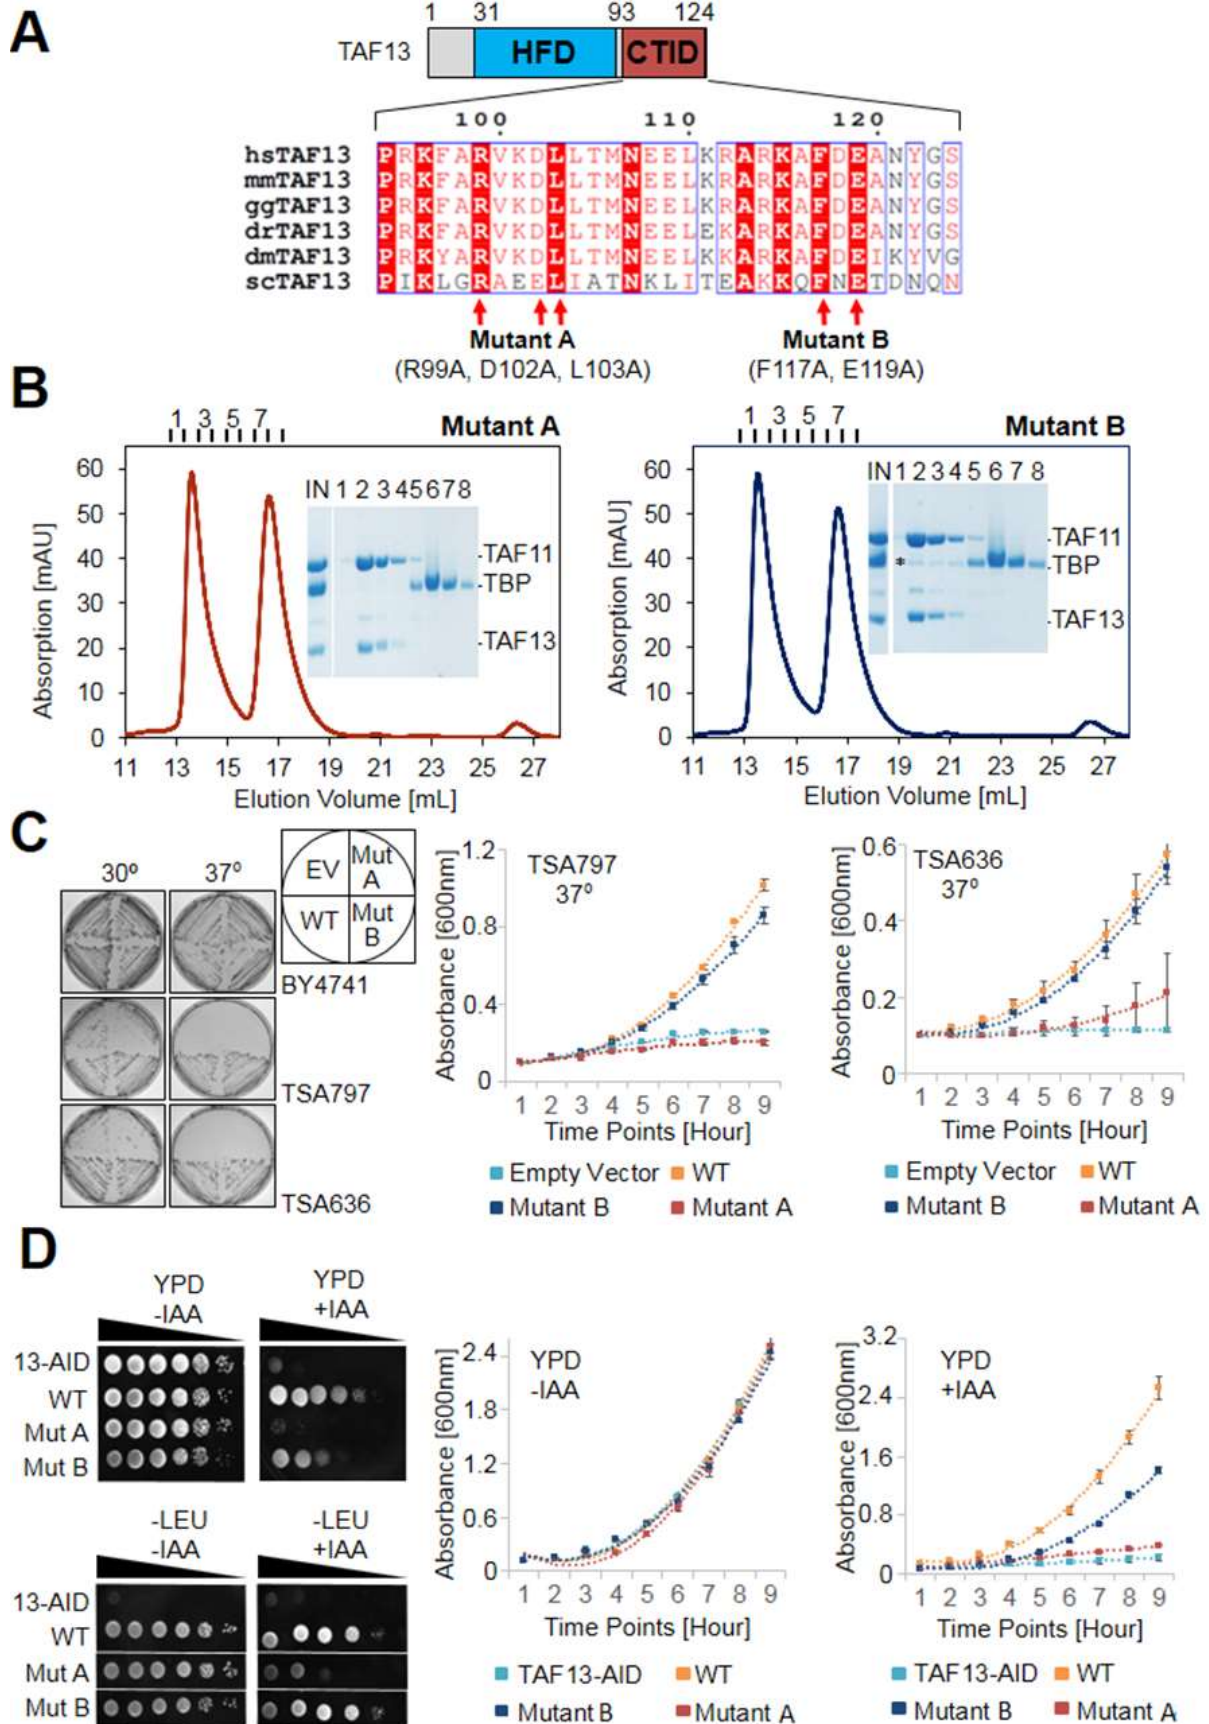

1208

1209 **Figure 5**

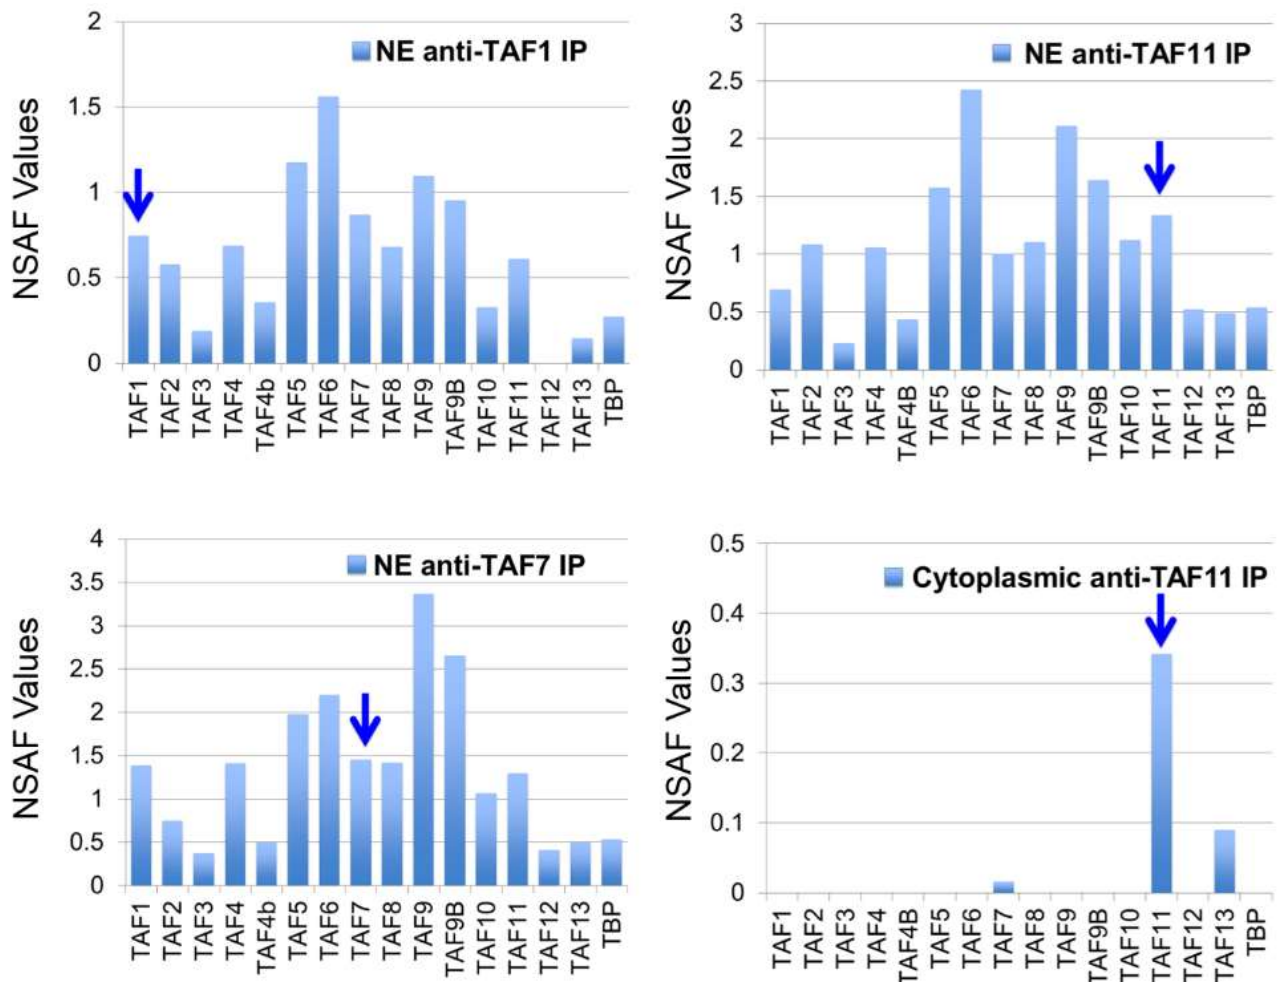

1210

1211 **Figure 6**

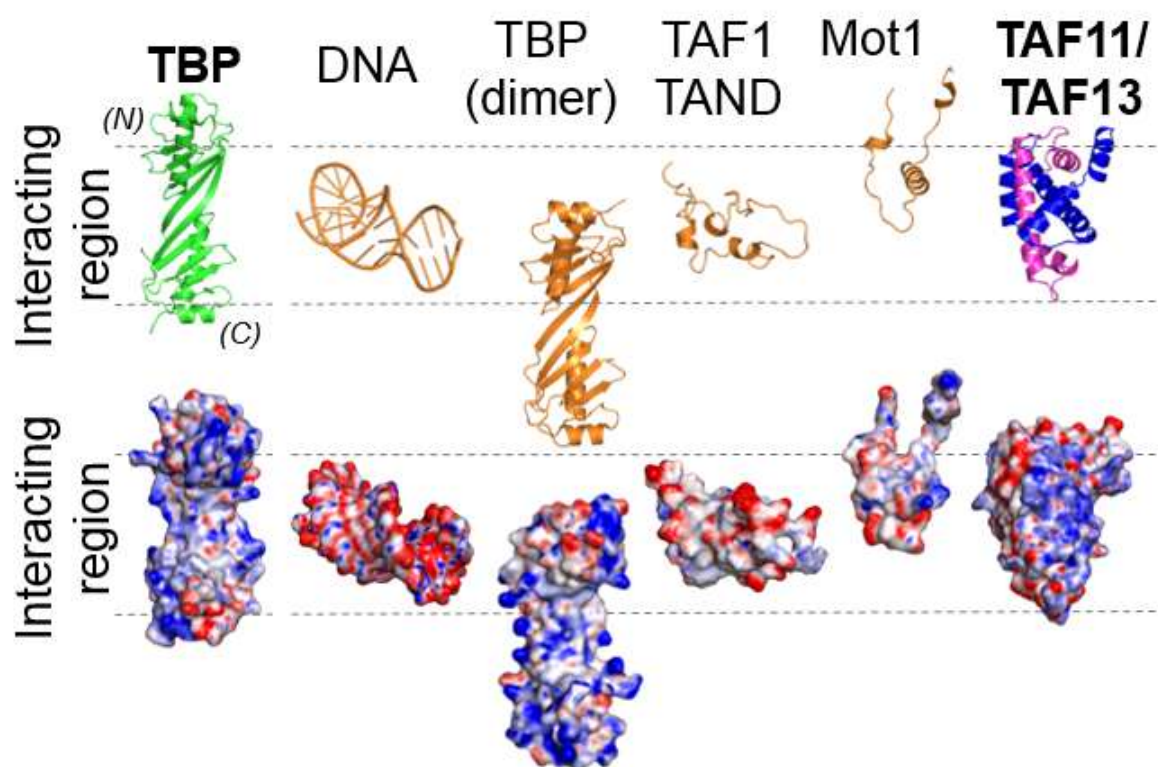

1212

1213 **Figure 7**

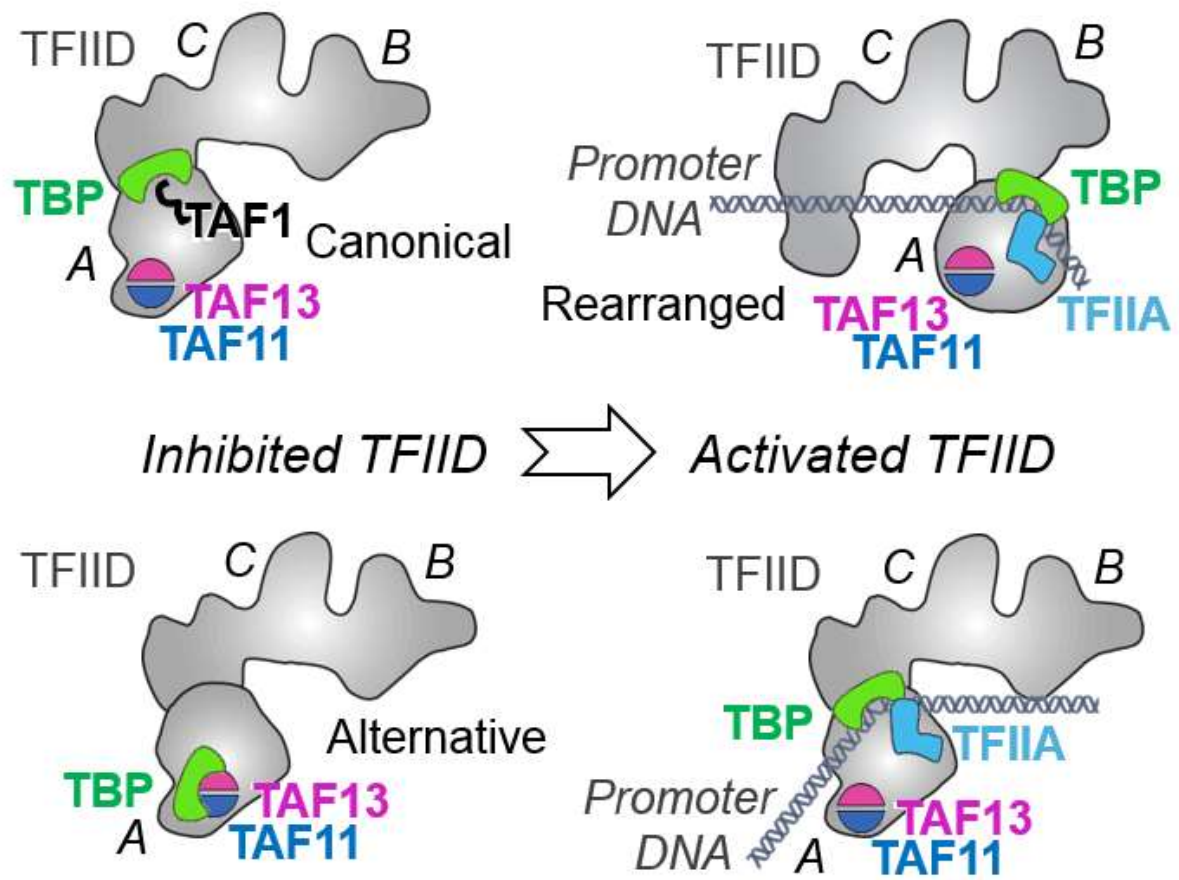

1214

1215



1216 **Figure 1–Figure Supplement 1**

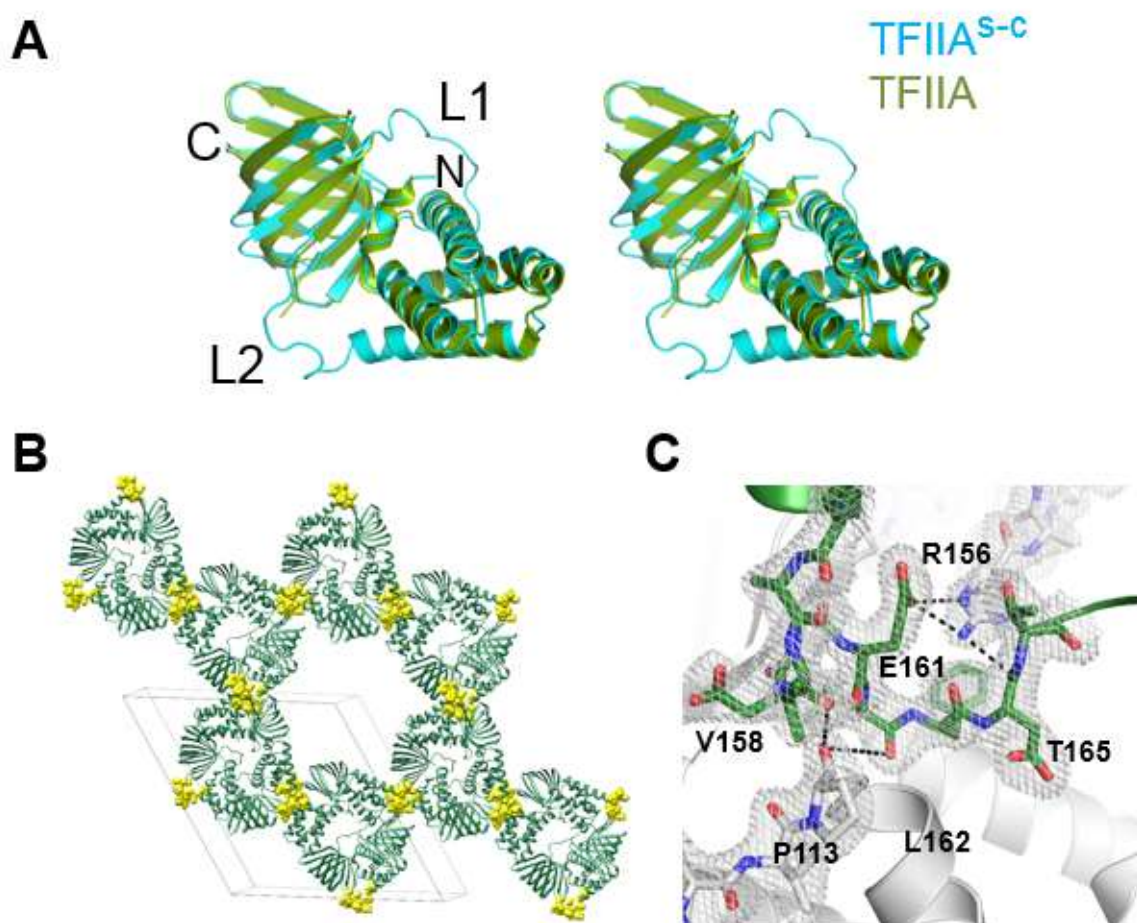

1219 **Figure 1–Figure Supplement 2**

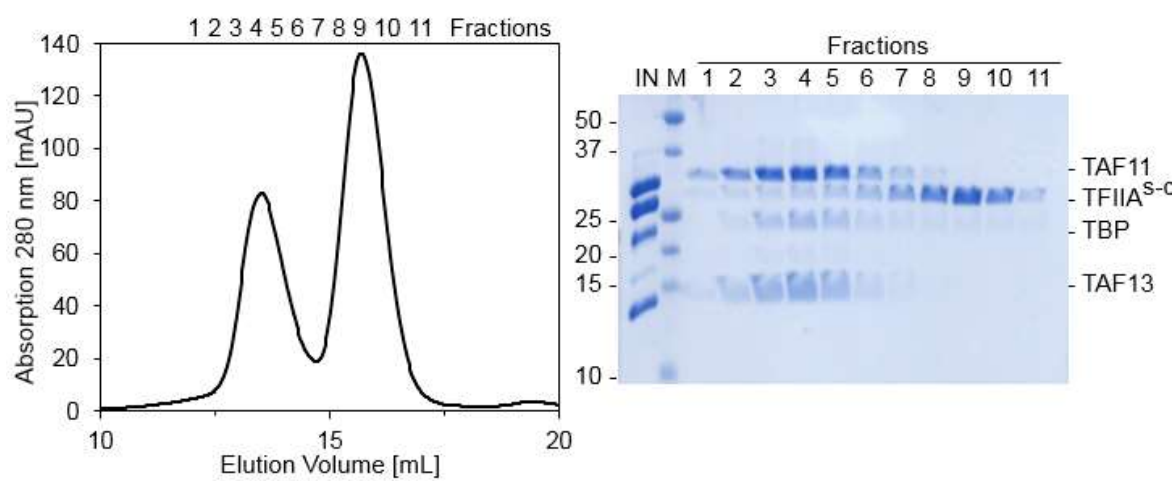

1222 **Figure 2–Figure Supplement 1**

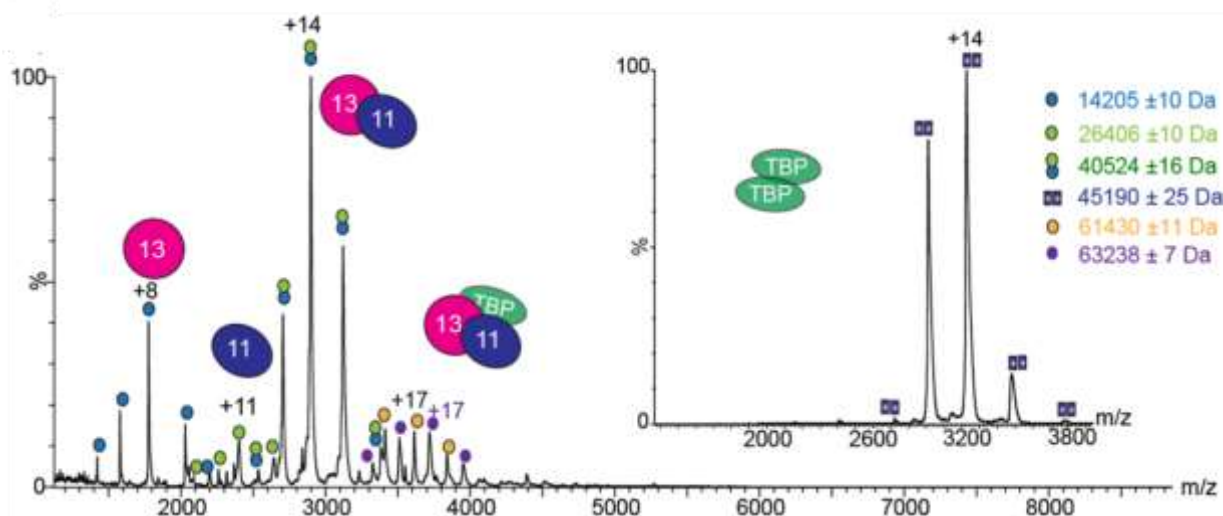

1225 **Figure 2–Figure Supplement 2**

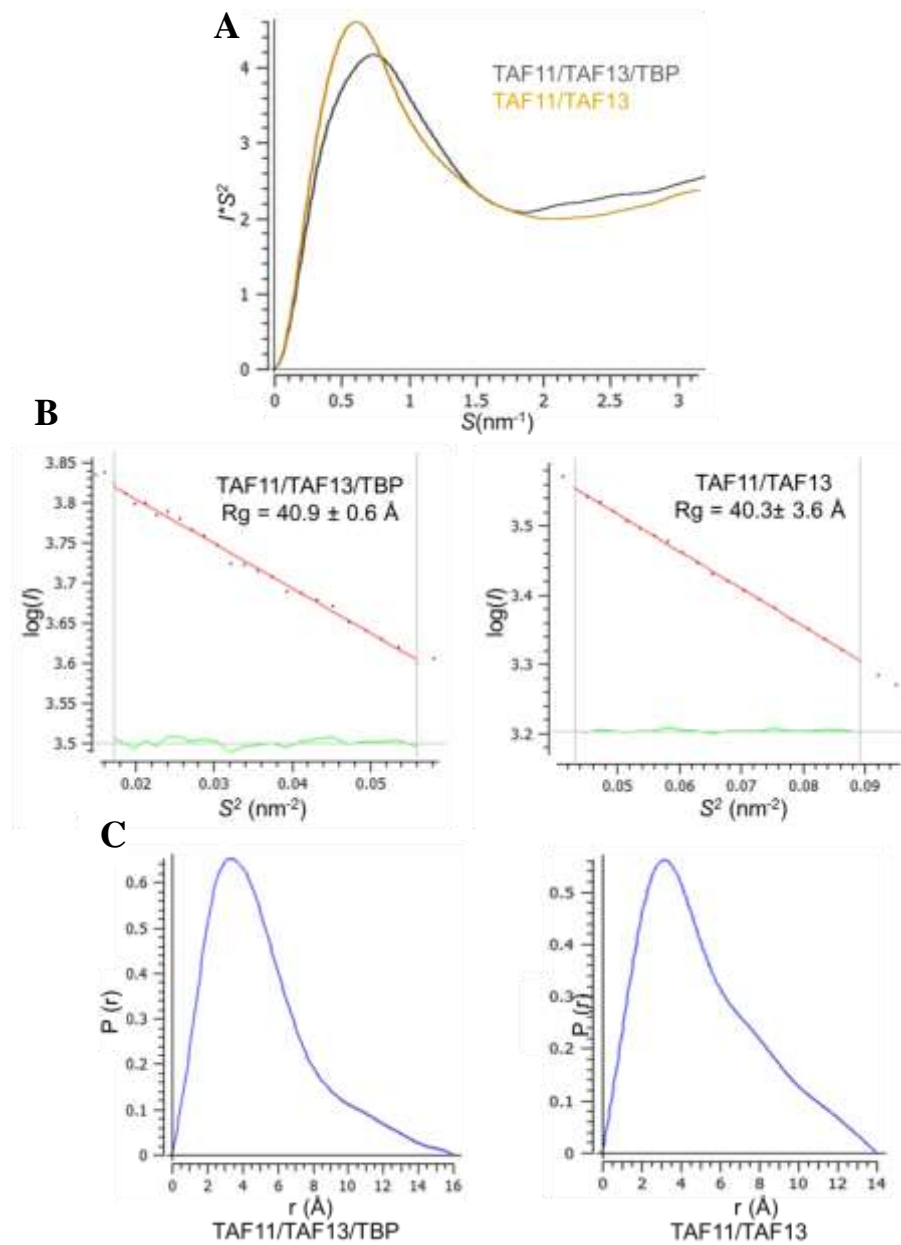

1226

1227

1228 **Figure 3–Figure Supplement 1**

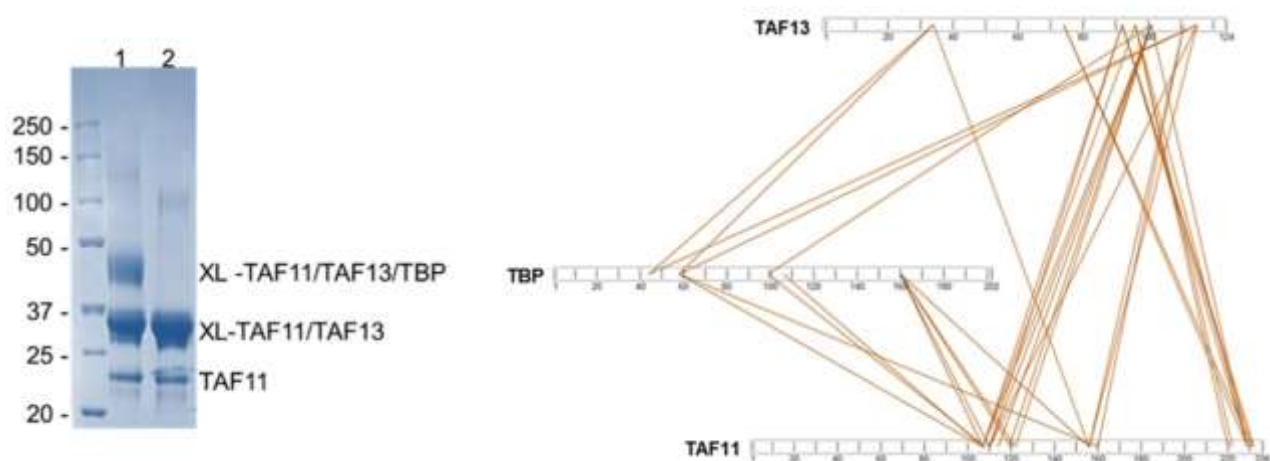

1229

1230

1231 **Figure 3–Figure Supplement 2**

1232

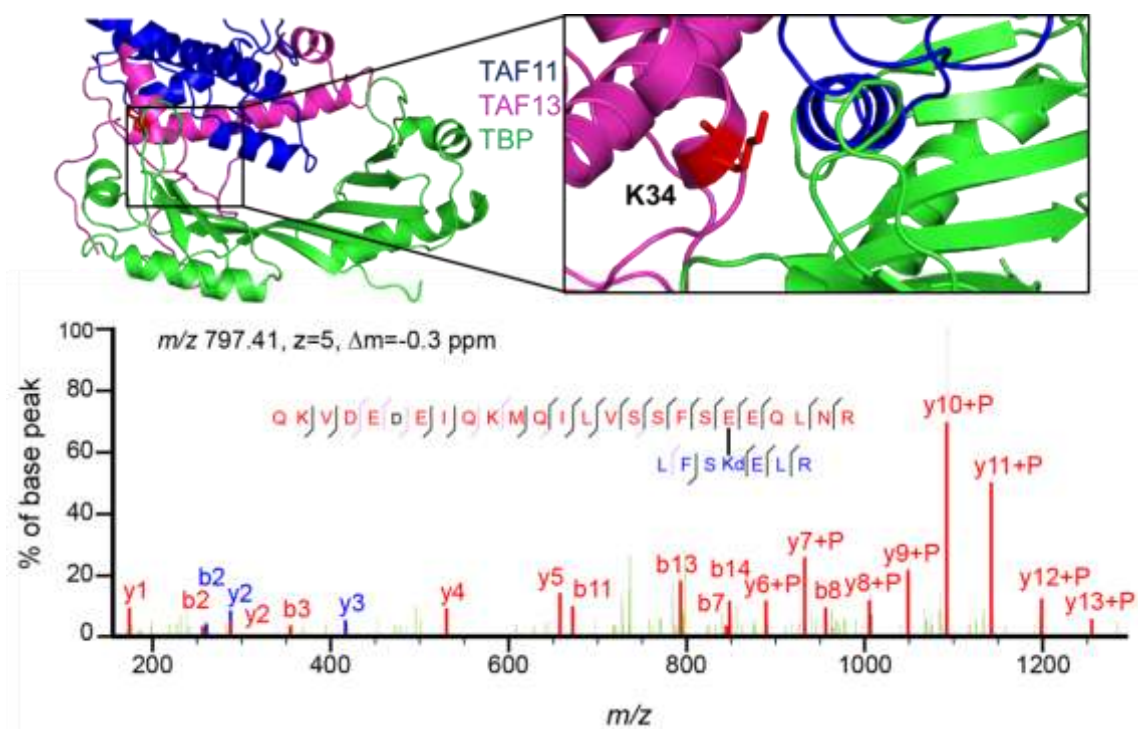

1233

1234

1235

1236 **Figure 3–Figure Supplement 3**

1237

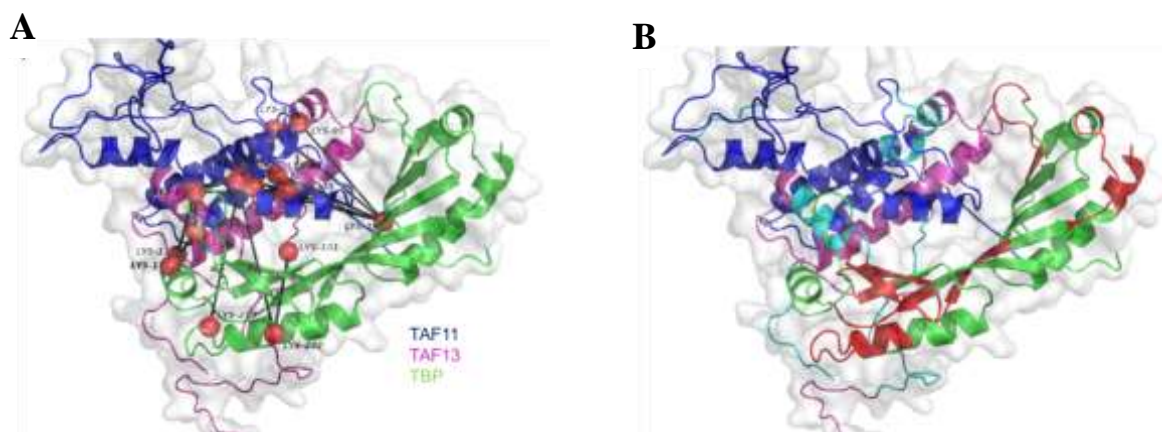

1242 **Figure 4–Figure Supplement 1**

1243

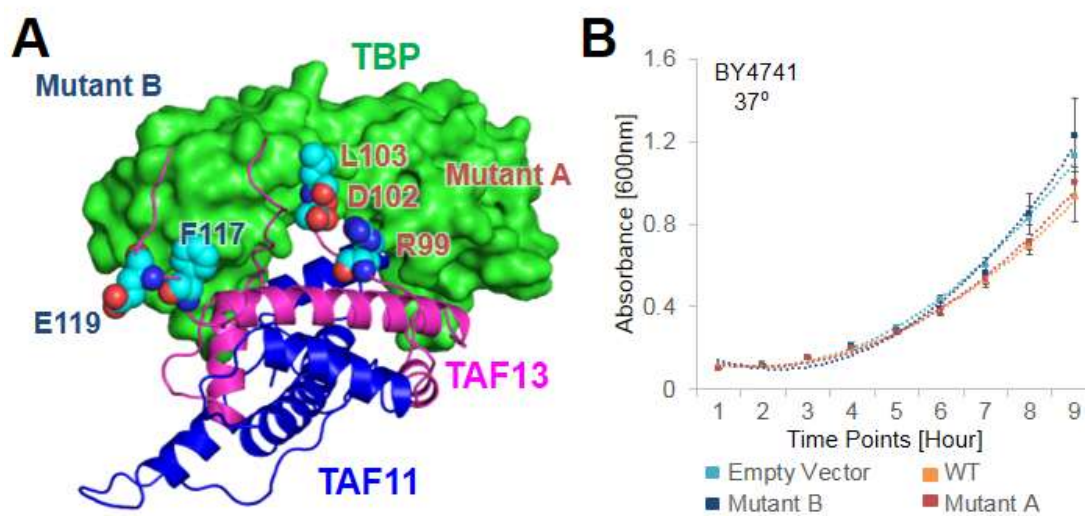

1244

1245



1246 **Figure 6–Figure Supplement 1**

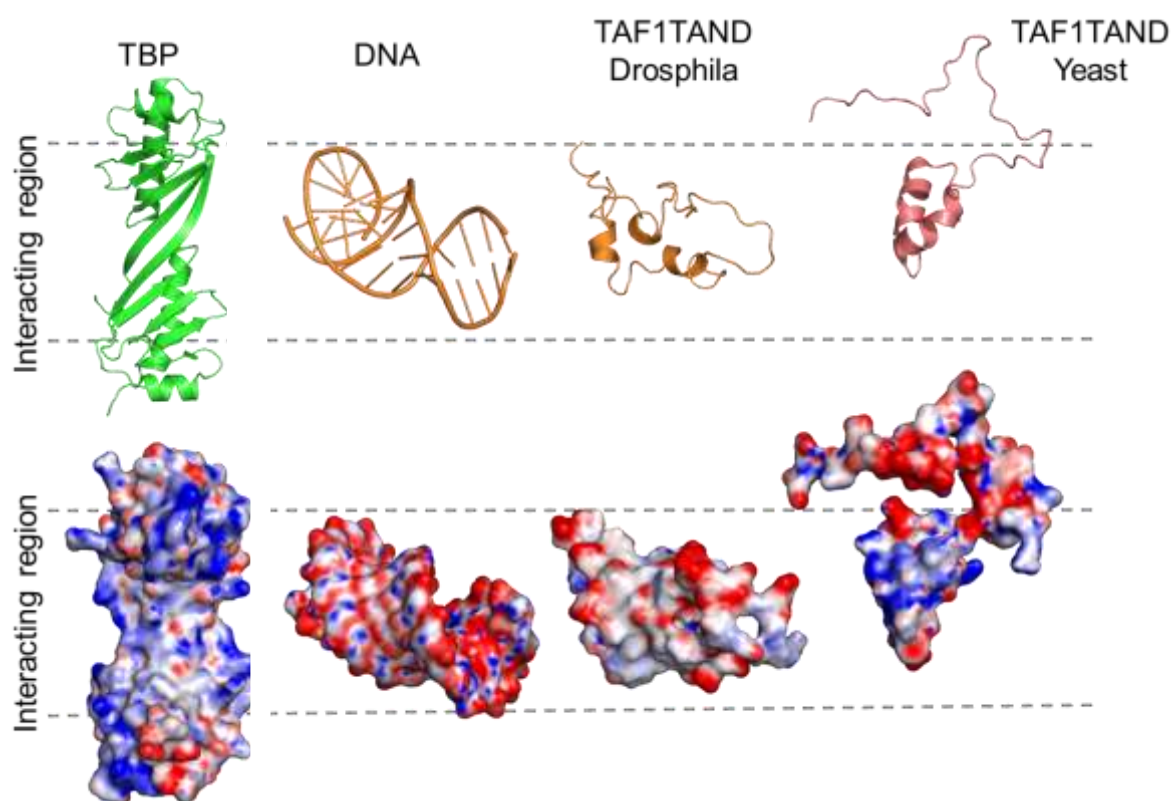

1247

1248

1249 **Table 1.**

1250 X-ray data collection and refinement statistics

| TFIIA <sup>s-c</sup>               |                        |
|------------------------------------|------------------------|
| <b>Data collection</b>             |                        |
| Space group                        | P65                    |
| Cell dimensions                    |                        |
| <i>a</i> , <i>b</i> , <i>c</i> (Å) | 123.3, 123.3, 34.8     |
| $\alpha$ , $\beta$ , $\gamma$ (°)  | 90, 90, 120            |
| Resolution (Å)                     | 53.4-2.4               |
| Last resolution bin (Å)            | 2.52-2.38              |
| $R_{\text{measure}}$ (%)           | 12.9 (64.8)            |
| $I / \sigma I$                     | 11.5 (2.72)            |
| Completeness (%)                   | 99.8 (99.9)            |
| Multiplicity                       | 6.7 (6.8)              |
| <b>Refinement</b>                  |                        |
| Resolution (Å)                     | 40.36-2.38 (2.44-2.38) |
| No. reflections                    |                        |
| Work set                           | 11859                  |
| Free set                           | 601                    |
| $R_{\text{work}}$                  | 0.18 (0.27)            |
| $R_{\text{free}}$                  | 0.24 (0.36)            |
| No. atoms                          |                        |
| Protein                            | 1689                   |
| Water                              | 50                     |
| r.m.s deviations                   |                        |
| Bond lengths (Å)                   | 0.0223                 |
| Bond angles (°)                    | 2.088                  |

1251 \*Values in parentheses are for highest resolution shell.

1252

1253 **Table 2.**

1254 Data collection and refinement statistics SAXS

|                                            | TAF11/TAF13/TBP                        | TAF11/TAF13                            |
|--------------------------------------------|----------------------------------------|----------------------------------------|
| <b>Data collection parameters</b>          |                                        |                                        |
| Beamline                                   | ESRF-BM29                              | ESRF-BM29                              |
| Beam size at sample                        | ~700 $\mu\text{m}$ x 700 $\mu\text{m}$ | ~700 $\mu\text{m}$ x 700 $\mu\text{m}$ |
| Wavelength ( $\text{\AA}$ )                | 0.931                                  | 0.931                                  |
| S range ( $\text{\AA}^{-1}$ )              | 0.003-0.497                            | 0.003-0.497                            |
| Concentration range (mg ml <sup>-1</sup> ) | 0.3-7.11                               | 0.53-7.48                              |
| Temperature ( $^{\circ}\text{C}$ )         | 4                                      | 4                                      |
| Beamline                                   | ESRF-BM29                              | ESRF-BM29                              |
| Beam size at sample                        | ~700 $\mu\text{m}$ x 700 $\mu\text{m}$ | ~700 $\mu\text{m}$ x 700 $\mu\text{m}$ |
| Wavelength ( $\text{\AA}$ )                | 0.931                                  | 0.931                                  |
| <b>Structural parameters<sup>†</sup></b>   |                                        |                                        |
| I(0) (arbitrary units) [from P(r)]         | 49.63                                  | 43.65                                  |
| Rg ( $\text{\AA}$ ) [from P(r)]            | 41                                     | 41.2                                   |
| I(0) (arbitrary units) (from Guinier)      | 50.21 $\pm$ 0.33                       | 44.15 $\pm$ 0.08                       |
| Rg ( $\text{\AA}$ ) (from Guinier)         | 40.9 $\pm$ 0.6                         | 40.3 $\pm$ 3.6                         |
| Dmax ( $\text{\AA}$ )                      | 160                                    | 140                                    |
| Porod volume estimate ( $\text{\AA}^3$ )   | 120110                                 | 89850                                  |
| Molecular mass Mr [from porod volume]      | 70.65 kDa                              | 52.91 kDa                              |
| I(0) (arbitrary units) [from P(r)]         | 49.63                                  | 43.65                                  |
| Rg ( $\text{\AA}$ ) [from P(r)]            | 41                                     | 41.2                                   |
| I(0) (arbitrary units) (from Guinier)      | 50.21 $\pm$ 0.33                       | 44.15 $\pm$ 0.08                       |
| Rg ( $\text{\AA}$ ) (from Guinier)         | 40.9 $\pm$ 0.6                         | 40.3 $\pm$ 3.6                         |
| Dmax ( $\text{\AA}$ )                      | 160                                    | 140                                    |
| Porod volume estimate ( $\text{\AA}^3$ )   | 120110                                 | 89850                                  |
| Molecular mass Mr [from porod volume]      | 70.65 kDa                              | 52.91 kDa                              |

1255 <sup>†</sup> Reported for experimental merged data.

1256

1257 **Table 3.**

1258 Peptide deuteration level changes upon complex formation in HDX-MS

| TAF11                   |                    |                                      |                                       |
|-------------------------|--------------------|--------------------------------------|---------------------------------------|
| <i>Residues Numbers</i> | <i>Sequence</i>    | $\Delta\%D$<br>(15 Sec) <sup>†</sup> | $\Delta\%D$<br>(120 Sec) <sup>†</sup> |
| 93-96                   | EKKQ               | -8.465                               | -7.309                                |
| 105-109                 | KMQIL              | -7.014                               |                                       |
| 150-153                 | VVIA               |                                      | -7.295                                |
| TAF13                   |                    |                                      |                                       |
| <i>Residues Numbers</i> | <i>Sequence</i>    | $\Delta\%D$<br>(15 Sec) <sup>†</sup> | $\Delta\%D$<br>(120 Sec) <sup>†</sup> |
| 14-31                   | NEEIGGGAEGGQGKRKRL | -7.507                               | -7.192                                |
| 32-35                   | FSKE               | -8.794                               |                                       |
| 36-40                   | LRCMM              | -7.0                                 |                                       |
| 86-88                   | IVF                | -8.598                               |                                       |
| 86-89                   | IVFL               | -10.366                              |                                       |
| 97-104                  | FARVKDLL           |                                      | -7.223                                |
| 116-124                 | AFDEANYGS          | 10.89                                | 8.721                                 |
| TBP                     |                    |                                      |                                       |
| <i>Residues Numbers</i> | <i>Sequence</i>    | $\Delta\%D$<br>(15 Sec) <sup>†</sup> | $\Delta\%D$<br>(120 Sec) <sup>†</sup> |
| 157-167*                | IVPQLQNIIVST       |                                      | 9.038                                 |
| 167-174                 | TVNLGCKL           | -9.675                               | -10.171                               |
| 193-197                 | FAAVI              | -14.068                              | -12.267                               |
| 197-208                 | IMRIREPRTTAL       | -7.785                               |                                       |
| 199-208                 | RIREPRTTAL         | -9.661                               |                                       |
| 209-215                 | IFSSGKM            | -8.655                               | -8.75                                 |
| 232-244                 | KYARVVQKLGFP       | -21.337                              | -18.382                               |
| 233-242                 | YARVVQKLG          | -7.128                               |                                       |
| 247-252                 | LDFKIQ             |                                      | -7.271                                |
| 250-256                 | KIQNMVG            | -8.913                               |                                       |
| 259-266                 | DVKFPIRL           | -11.932                              | -10.109                               |
| 259-268                 | DVKFPIRLEG         | -13.79                               | -11.479                               |
| 260-266                 | VKFPIRL            | -10.393                              |                                       |
| 260-268                 | VKFPIRLEG          | -16.066                              | -13.002                               |
| 281-287                 | PELFPGL            |                                      | -7.811                                |
| 285-289                 | PGLIY              | -8.061                               | -7.339                                |
| 326-335                 | PILKGFRKTT         | -7.077                               | -7.902                                |

1259 <sup>†</sup> Peptides exhibiting changes in deuteration level  $\geq 7\%$  are shown.

1260 \* TBP peptide with increasing deuteration level upon complex formation.

1261

1262 **Table 4.** Cross-links observed by BS3 CLMS

| TAF11-TBP            |                      |                       |                      |
|----------------------|----------------------|-----------------------|----------------------|
| <i>TAF11 Residue</i> | <i>TBP Residue</i>   | <i>No. of matches</i> | <i>Highest Score</i> |
| K122                 | K160                 | 5                     | 9.416                |
| K110                 | K160                 | 2                     | 8.818                |
| K107                 | K106                 | 2                     | 8.314                |
| K160                 | K58                  | 1                     | 8.085                |
| K107                 | K160                 | 2                     | 7.926                |
| K107                 | K58                  | 1                     | 7.684                |
| K156                 | K160                 | 1                     | 6.928                |
| K108                 | K99                  | 1                     | 6.124                |
| K120                 | K160                 | 1                     | 4.145                |
| (9 unique links)     |                      |                       |                      |
| TAF13-TBP            |                      |                       |                      |
| <i>TAF13 Residue</i> | <i>TBP Residue</i>   | <i>No. of matches</i> | <i>Highest Score</i> |
| K34                  | K44                  | 1                     | 10.578               |
| K34                  | K58                  | 1                     | 7.856                |
| K101                 | K99                  | 1                     | 7.584                |
| K115                 | K58                  | 1                     | 7.519                |
| K115                 | K44                  | 1                     | 5.742                |
| (5 unique links)     |                      |                       |                      |
| TAF11-TAF13          |                      |                       |                      |
| <i>TAF11 Residue</i> | <i>TAF13 Residue</i> | <i>No. of matches</i> | <i>Highest Score</i> |
| K220                 | K96                  | 2                     | 12.795               |
| K110                 | K101                 | 2                     | 12.014               |
| K229                 | K96                  | 3                     | 11.053               |
| K114                 | K101                 | 5                     | 10.98                |
| K229                 | K101                 | 6                     | 10.909               |
| K156                 | K34                  | 3                     | 9.627                |
| K107                 | K92                  | 2                     | 9.321                |
| K222                 | K96                  | 2                     | 9.308                |
| K156                 | K111                 | 10                    | 9.226                |
| K160                 | K111                 | 2                     | 8.371                |
| K156                 | K115                 | 1                     | 8.326                |
| K232                 | K92                  | 1                     | 8.292                |
| K107                 | K96                  | 1                     | 7.981                |
| K110                 | K115                 | 1                     | 7.943                |
| K119                 | K101                 | 2                     | 7.934                |
| K122                 | K101                 | 1                     | 7.867                |
| K229                 | K92                  | 4                     | 6.872                |
| K110                 | K92                  | 1                     | 6.817                |
| K107                 | K101                 | 1                     | 6.437                |
| K231                 | K92                  | 1                     | 5.77                 |
| K229                 | S74                  | 1                     | 3.42                 |
| K231                 | S74                  | 1                     | 3.42                 |
| (22 unique links)    |                      |                       |                      |

1263

1264 **Table 5.**

1265 Interaction surfaces in TBP complexes

| <i>Interactor</i>                       | <i>Interface (Å<sup>2</sup>)</i> |
|-----------------------------------------|----------------------------------|
| TBP Dimer                               | 3010.2                           |
| DNA                                     | 4020.1                           |
| TAF1-TAND<br>( <i>D. melanogaster</i> ) | 3287.8                           |
| TAF1-TAND (Yeast)                       | 7483.1†                          |
| Mot1 ( <i>E. cuniculi</i> )             | 4300.0                           |
| TAF11/TAF13                             | 3305.2                           |

1266 *Calculated with PyMol v1.8.2.0 ([www.pymol.org](http://www.pymol.org))*

1267 † *includes TAND1 and TAND2*
